# Supplementary material for: Molecular designs with PEG groups for water-solubilization of sparsely substituted porphyrins
Source: Royal Society of Chemistry journal article supplement (doi:10.1039/d4nj01178c), 2024-01-01
Supplement: d4nj01178c1.pdf [file d4nj01178c1.pdf]

Supplementary Information for:  
**Molecular Designs with PEG Groups for Water-Solubilization  
of Sparsely Substituted Porphyrins**

Phuong-Lien Doan Cao,<sup>a</sup> Zhiyuan Wu,<sup>a</sup> Phattananawee Nalaoh,<sup>b</sup> and Jonathan S. Lindsey<sup>a,\*</sup>

<sup>a</sup> Department of Chemistry, North Carolina State University, Raleigh, NC 27695, USA

<sup>b</sup> Department of Chemistry, University of Tennessee, Knoxville, TN 37996, USA

**Table of Contents**

| Topic                                     | Page |
|-------------------------------------------|------|
| (1) Aggregation study in PBS + 3% BSA     | S1   |
| (2) Solubility                            | S2   |
| (3) Single-crystal X-ray diffraction data | S4   |
| (4) Spectral data                         | S6   |

**(1) Aggregation study in PBS + 3% BSA**

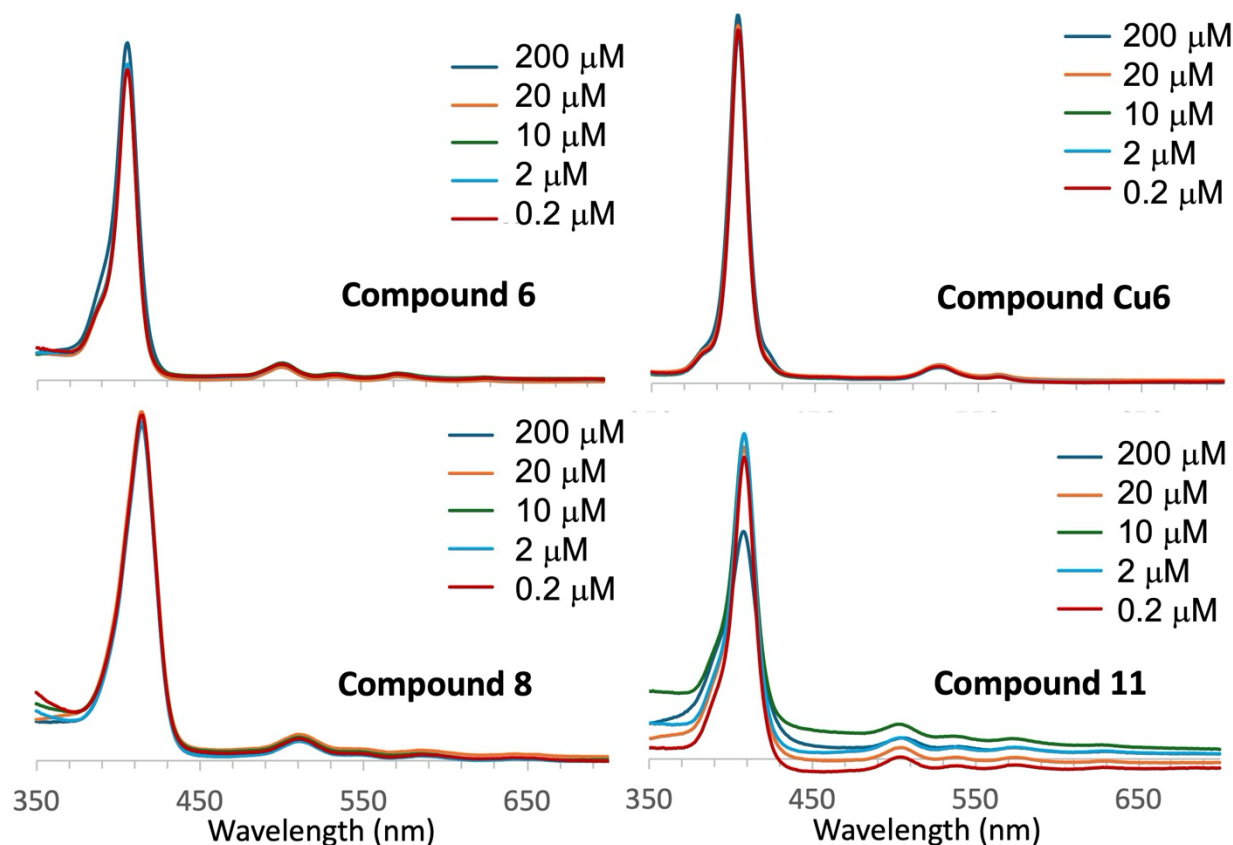

**Figure S1.** Absorption spectra of porphyrins as a function of concentration in PBS + 3% BSA at room temperature.

## (2) Solubility

Two absorption spectra collected during the concentration-dependent self-aggregation study are displayed here without any overlays as in Figure 4 (the spectra are taken from Figure 4). The absorption spectrum of free base *trans*-A<sub>2</sub> porphyrin **6** shows the characteristic Soret band (406 nm) as well as the single major band (501 nm) and progression of weaker bands (534, 573 and 628 nm) in the visible region. The absorption spectrum of free base *trans*-AB porphyrin **11** shows a broadened Soret band (409 nm). The visible bands appear at the expected positions but on an underlying descending slope with increasing wavelength. The broadened Soret band is attributed to self-aggregation, as discussed in the text.

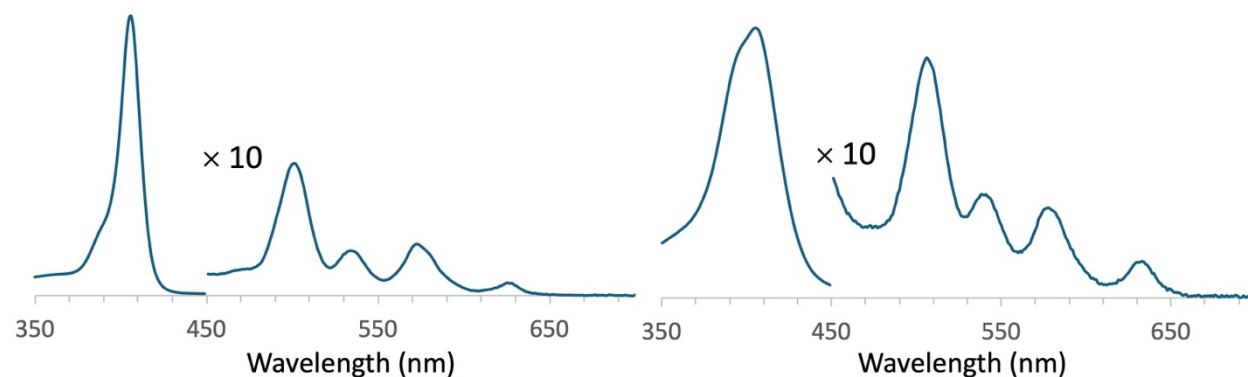

**Figure S2.** Absorption spectra of free base porphyrins at 200  $\mu\text{M}$  in PBS at room temperature (0.1 mm pathlength cuvettes). Left panel: *trans*-A<sub>2</sub> porphyrin **6**. Right panel: *trans*-AB porphyrin **11**.

Photographs of the two porphyrins in solution at room temperature were collected at several concentrations. The photographs are shown in Figure S3.

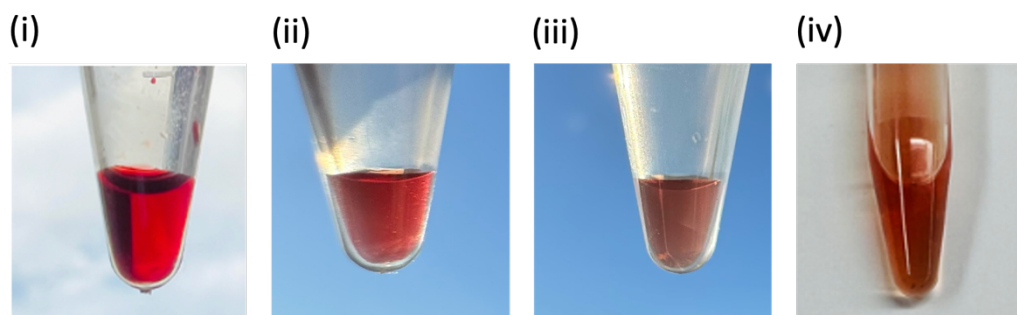

**Figure S3.** Photographs of porphyrins in aqueous media. See text below for sample identity.

- (i) Free base *trans*-A<sub>2</sub> porphyrin **6** at 12 mM in water (photo with a sunlit sky background). The sample was prepared by dissolving 0.46 mg of **6** in 20  $\mu\text{L}$  of water, which corresponds to 23 mg/mL (MW = 1964 Da). A transparent red solution resulted without any precipitate as observed by visual inspection. The optical clarity is indicative of a homogeneous solution.
- (ii) Free base *trans*-A<sub>2</sub> porphyrin **6** at 1 mM in PBS (photo with a sunlit sky background). The solution appears rather clear upon visual inspection.
- (iii) Free base *trans*-AB **11** at 1 mM in PBS (photo with a sunlit sky background). The sample is somewhat muddy upon visual inspection.

(iv) Free base *trans*-AB **11** at ~0.48 mM in PBS (photo). The sample, now at larger volume and hence a longer visual pathlength, appears quite muddy upon visual inspection.

The absorption spectrum of *trans*-A<sub>2</sub> zinc porphyrin **Zn2**, which contains PEG groups located at the 3,5-positions of the aryl groups, is shown in Figure S4. The extensive broadening of the Soret band is indicative of self-aggregation.

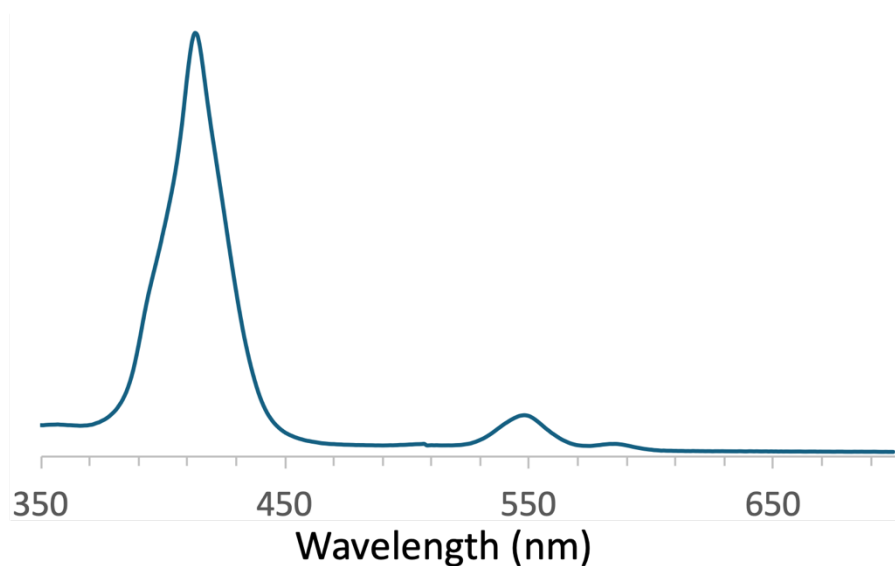

**Figure S4.** Absorption spectrum of porphyrin **Zn2** at 10  $\mu$ M in deionized water at room temperature (1-cm pathlength cuvette).

### (3) Single-crystal X-ray diffraction data

**Table S1.** Single-crystal X-ray structure data for **Zn5**

|                                                 |                                                                  |
|-------------------------------------------------|------------------------------------------------------------------|
| CCDC registry                                   | 2321457                                                          |
| Chemical formula                                | C <sub>52</sub> H <sub>44</sub> N <sub>4</sub> O <sub>6</sub> Zn |
| Formula weight (g/mol)                          | 886.28                                                           |
| Temperature (K)                                 | 100                                                              |
| Wavelength (Å)                                  | 0.71073                                                          |
| Crystal size (mm)                               | 0.266 × 0.161 × 0.065                                            |
| Crystal habit                                   | Red block                                                        |
| Crystal system                                  | monoclinic                                                       |
| Space group                                     | P 1 21/n 1                                                       |
| Unit cell dimension, <i>a</i> (Å)               | 10.0085(5)                                                       |
| Unit cell dimension, <i>b</i> (Å)               | 17.5831(9)                                                       |
| Unit cell dimension, <i>c</i> (Å)               | 12.4044(7)                                                       |
| α, deg                                          | 90                                                               |
| β, deg                                          | 95.778(2)                                                        |
| γ, deg                                          | 90                                                               |
| Volume (Å <sup>3</sup> )                        | 2171.8(2)                                                        |
| <i>Z</i>                                        | 2                                                                |
| Density (calculated) (g/cm <sup>3</sup> )       | 1.355                                                            |
| Absorption coefficient (mm <sup>-1</sup> )      | 0.622                                                            |
| F(000)                                          | 924.0                                                            |
| Theta range for data collection, deg            | 4.702 to 54.2                                                    |
| Index ranges                                    | -12 ≤ <i>h</i> ≤ 12, -22 ≤ <i>k</i> ≤ 22, -15 ≤ <i>l</i> ≤ 15    |
| Reflections collected                           | 37231                                                            |
| Independent reflections                         | 4782 [R int = 0.0399, R sigma = 0.0237]                          |
| R <sub>1</sub>                                  | 0.0334                                                           |
| wR <sub>2</sub>                                 | 0.0868                                                           |
| R <sub>1</sub> (all data)                       | 0.0353                                                           |
| wR <sub>2</sub> (all data)                      | 0.0883                                                           |
| Largest diff. peak and hole (eÅ <sup>-3</sup> ) | 1.24 and -0.31                                                   |

**Table S2.** Bond lengths for **Zn5**

| Atom | Atom            | Length/Å   |
|------|-----------------|------------|
| Zn2  | O2 <sup>1</sup> | 2.4122(12) |
| Zn2  | O2              | 2.4121(12) |
| Zn2  | N2 <sup>1</sup> | 2.0562(12) |
| Zn2  | N2              | 2.0562(12) |
| Zn2  | N3 <sup>1</sup> | 2.0466(12) |
| Zn2  | N3              | 2.0466(12) |
| O1   | C11             | 1.375(2)   |
| O1   | C26             | 1.4261(19) |
| O2   | C22             | 1.445(2)   |
| O2   | C25             | 1.444(2)   |
| O4   | C3              | 1.3751(19) |
| O4   | C8              | 1.4329(18) |
| N2   | C15             | 1.3684(18) |
| N2   | C27             | 1.3694(18) |
| N3   | C1              | 1.3694(19) |
| N3   | C2              | 1.3693(18) |
| C1   | C18             | 1.444(2)   |
| C1   | C20             | 1.396(2)   |
| C2   | C14             | 1.403(2)   |
| C2   | C19             | 1.448(2)   |
| C3   | C4              | 1.395(2)   |

| Atom | Atom             | Length/Å   |
|------|------------------|------------|
| C3   | C17              | 1.397(2)   |
| C4   | C5               | 1.390(3)   |
| C5   | C12              | 1.383(3)   |
| C6   | C7               | 1.184(3)   |
| C6   | C8               | 1.470(2)   |
| C9   | C10              | 1.178(5)   |
| C9   | C26              | 1.487(4)   |
| C11  | C12              | 1.396(2)   |
| C11  | C17              | 1.398(2)   |
| C13  | C16              | 1.359(2)   |
| C13  | C27              | 1.450(2)   |
| C14  | C17              | 1.4973(19) |
| C14  | C27              | 1.405(2)   |
| C15  | C16              | 1.4472(19) |
| C15  | C20 <sup>1</sup> | 1.397(2)   |
| C18  | C19              | 1.357(2)   |
| C22  | C23              | 1.518(3)   |
| C23  | C24              | 1.528(4)   |
| C24  | C25              | 1.519(3)   |
| C26  | C21              | 1.490(6)   |
| C21  | C28              | 1.180(9)   |

<sup>1</sup>1-X,1-Y,1-Z

**Table S3.** Bond angles for **Zn5**

| Atom            | Atom | Atom            | Angle/°    |
|-----------------|------|-----------------|------------|
| O2              | Zn2  | O2 <sup>1</sup> | 180.0      |
| N2              | Zn2  | O2 <sup>1</sup> | 88.30(4)   |
| N2 <sup>1</sup> | Zn2  | O2              | 88.30(4)   |
| N2 <sup>1</sup> | Zn2  | O2 <sup>1</sup> | 91.70(4)   |
| N2              | Zn2  | O2              | 91.70(4)   |
| N2 <sup>1</sup> | Zn2  | N2              | 180.00(5)  |
| N3              | Zn2  | O2              | 90.34(5)   |
| N3              | Zn2  | O2 <sup>1</sup> | 89.66(5)   |
| N3 <sup>1</sup> | Zn2  | O2              | 89.66(5)   |
| N3 <sup>1</sup> | Zn2  | O2 <sup>1</sup> | 90.34(5)   |
| N3              | Zn2  | N2 <sup>1</sup> | 90.86(5)   |
| N3 <sup>1</sup> | Zn2  | N2 <sup>1</sup> | 89.14(5)   |
| N3 <sup>1</sup> | Zn2  | N2              | 90.86(5)   |
| N3              | Zn2  | N2              | 89.14(5)   |
| N3              | Zn2  | N3 <sup>1</sup> | 180.0      |
| C11             | O1   | C26             | 117.68(13) |
| C22             | O2   | Zn2             | 118.74(10) |
| C25             | O2   | Zn2             | 121.87(11) |
| C25             | O2   | C22             | 108.03(15) |
| C3              | O4   | C8              | 118.17(13) |
| C15             | N2   | Zn2             | 125.66(9)  |
| C15             | N2   | C27             | 106.74(12) |
| C27             | N2   | Zn2             | 127.32(10) |
| C1              | N3   | Zn2             | 125.64(10) |
| C1              | N3   | C2              | 106.85(12) |
| C2              | N3   | Zn2             | 127.40(10) |
| N3              | C1   | C18             | 109.80(13) |
| N3              | C1   | C20             | 125.35(13) |
| C20             | C1   | C18             | 124.84(14) |
| N3              | C2   | C14             | 125.48(13) |
| N3              | C2   | C19             | 109.47(13) |
| C14             | C2   | C19             | 125.03(13) |
| O4              | C3   | C4              | 124.41(15) |
| O4              | C3   | C17             | 114.43(13) |

| Atom             | Atom | Atom             | Angle/°    |
|------------------|------|------------------|------------|
| C4               | C3   | C17              | 121.12(15) |
| C5               | C4   | C3               | 118.49(16) |
| C12              | C5   | C4               | 122.08(15) |
| C7               | C6   | C8               | 177.59(18) |
| O4               | C8   | C6               | 113.18(14) |
| C10              | C9   | C26              | 178.1(3)   |
| O1               | C11  | C12              | 124.20(15) |
| O1               | C11  | C17              | 114.49(13) |
| C12              | C11  | C17              | 121.31(15) |
| C5               | C12  | C11              | 118.44(16) |
| C16              | C13  | C27              | 106.89(13) |
| C2               | C14  | C17              | 116.89(13) |
| C2               | C14  | C27              | 125.40(13) |
| C27              | C14  | C17              | 117.71(13) |
| N2               | C15  | C16              | 109.94(12) |
| N2               | C15  | C20 <sup>1</sup> | 125.01(13) |
| C20 <sup>1</sup> | C15  | C16              | 125.03(13) |
| C13              | C16  | C15              | 106.74(13) |
| C3               | C17  | C11              | 118.53(14) |
| C3               | C17  | C14              | 120.97(14) |
| C11              | C17  | C14              | 120.48(14) |
| C19              | C18  | C1               | 106.85(13) |
| C18              | C19  | C2               | 107.01(13) |
| C1               | C20  | C15 <sup>1</sup> | 127.27(13) |
| O2               | C22  | C23              | 104.27(17) |
| C22              | C23  | C24              | 102.50(18) |
| C25              | C24  | C23              | 104.23(18) |
| O2               | C25  | C24              | 107.41(19) |
| O1               | C26  | C9               | 107.60(16) |
| O1               | C26  | C21              | 107.2(2)   |
| N2               | C27  | C13              | 109.68(12) |
| N2               | C27  | C14              | 125.18(13) |
| C14              | C27  | C13              | 125.12(13) |
| C28              | C21  | C26              | 178.7(6)   |

<sup>1</sup>1-X,1-Y,1-Z**(4) Spectral data**

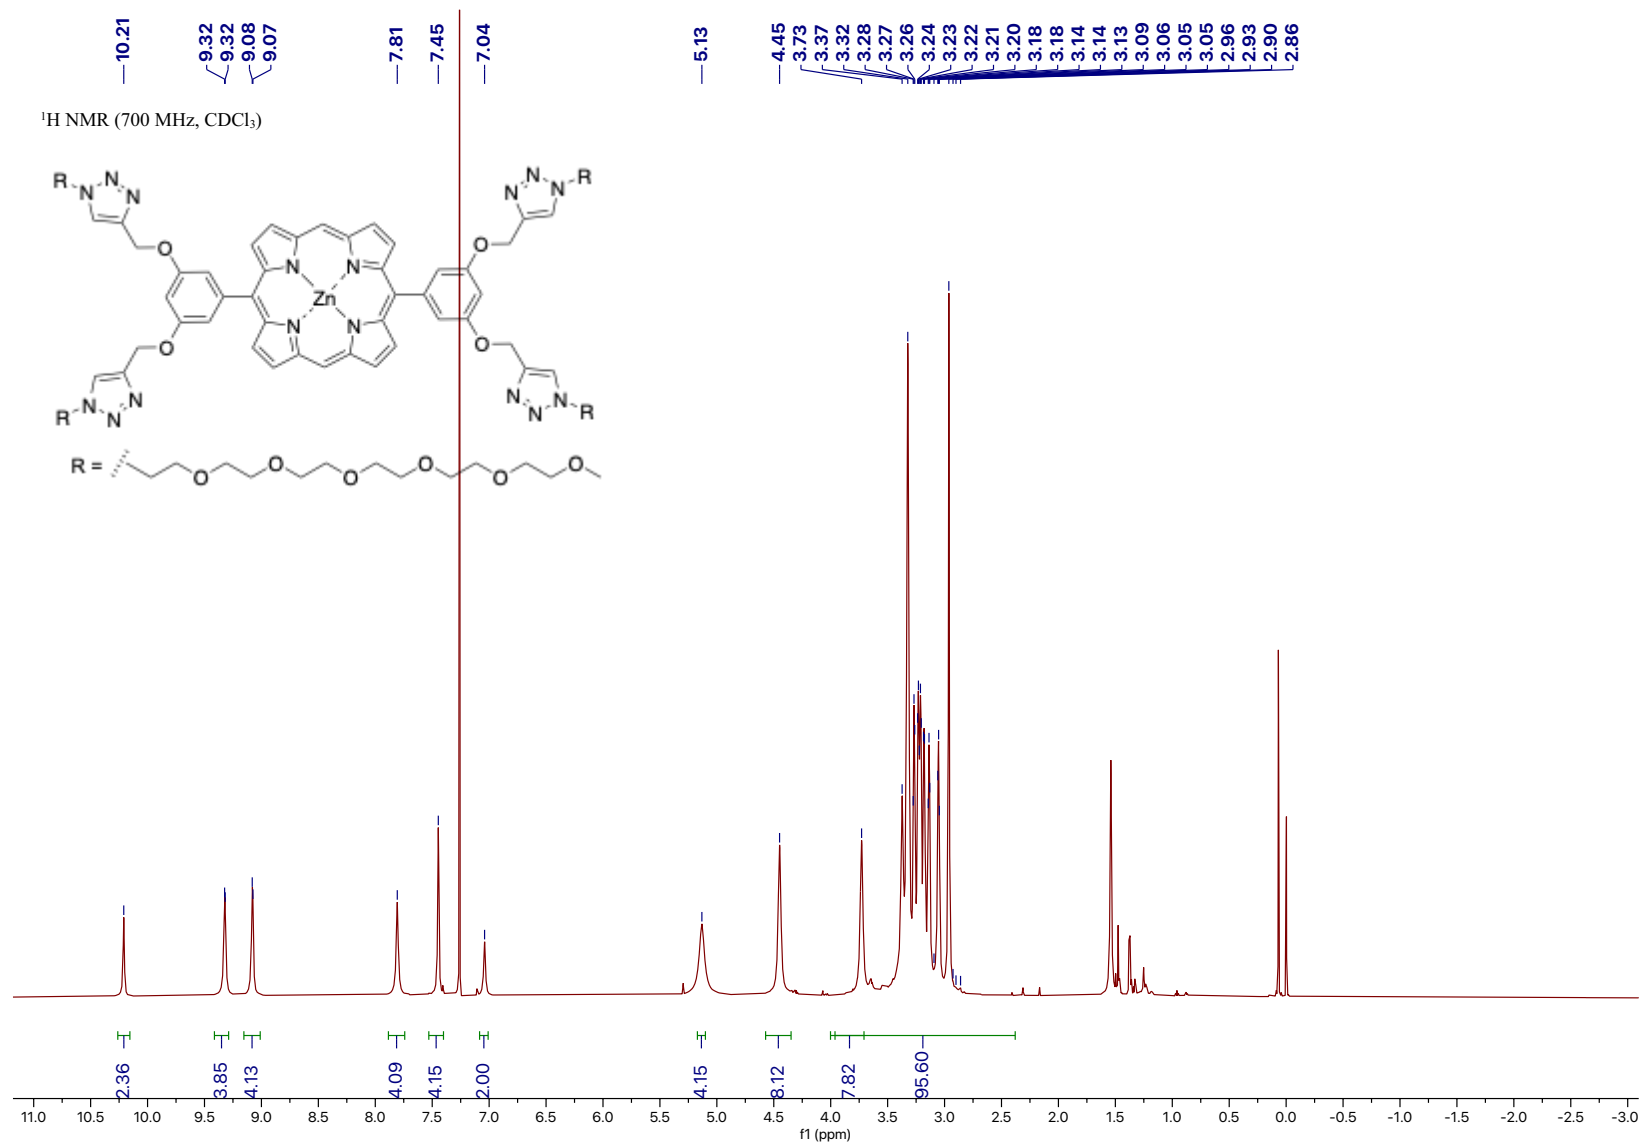

<sup>1</sup>H NMR spectrum of **Zn<sub>2</sub>** (in CDCl<sub>3</sub>)

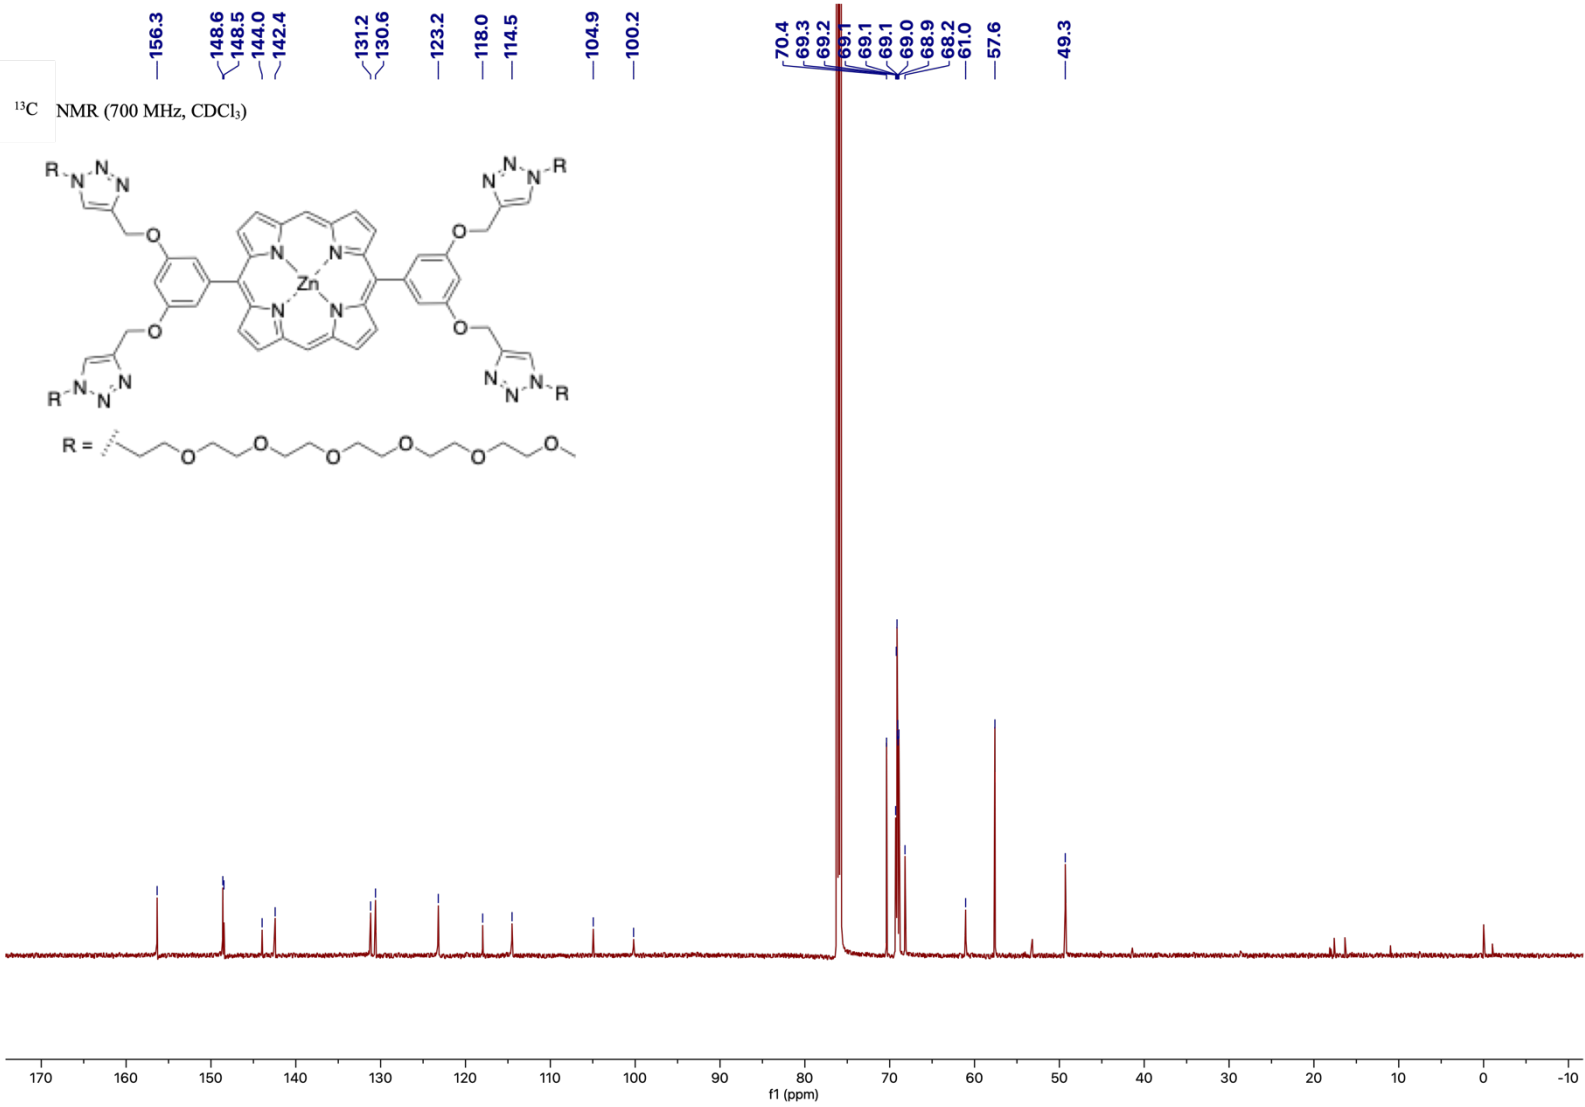

<sup>13</sup>C{<sup>1</sup>H} NMR spectrum of **Zn2** (in CDCl<sub>3</sub>)



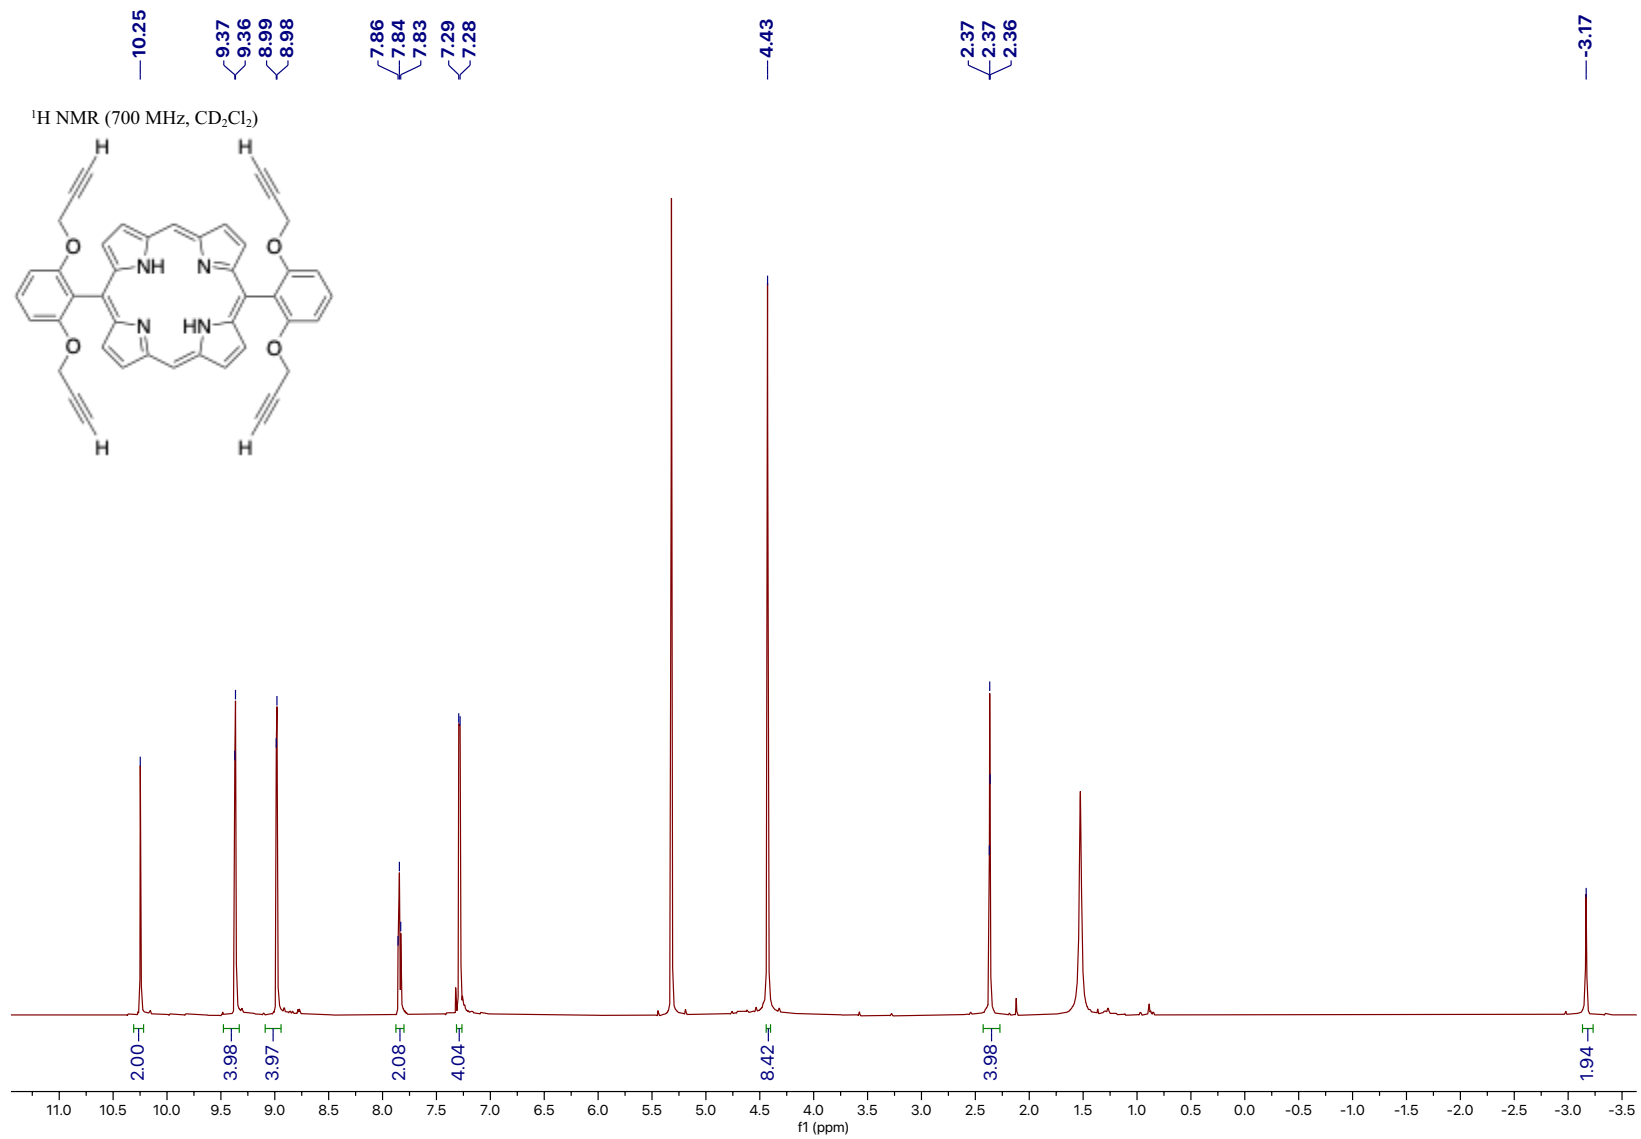

<sup>1</sup>H NMR spectrum of **5** (in CD<sub>2</sub>Cl<sub>2</sub>)

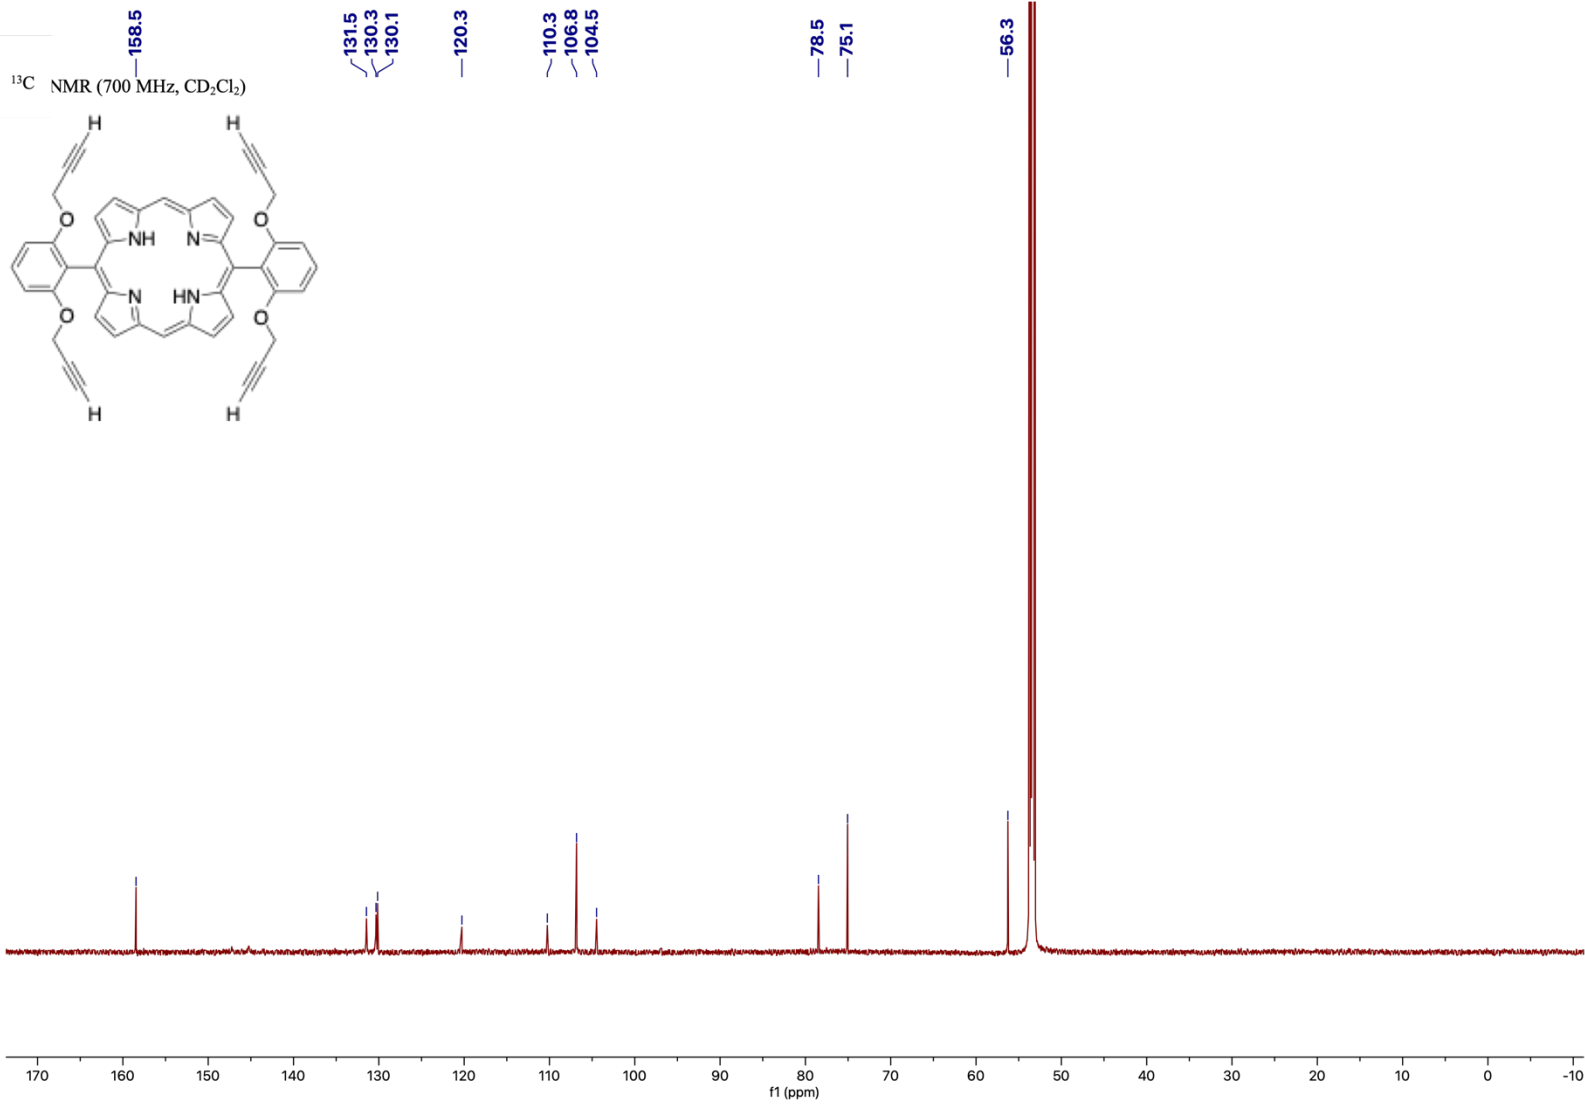

<sup>13</sup>C {<sup>1</sup>H} NMR spectrum of **5** (in CD<sub>2</sub>Cl<sub>2</sub>)

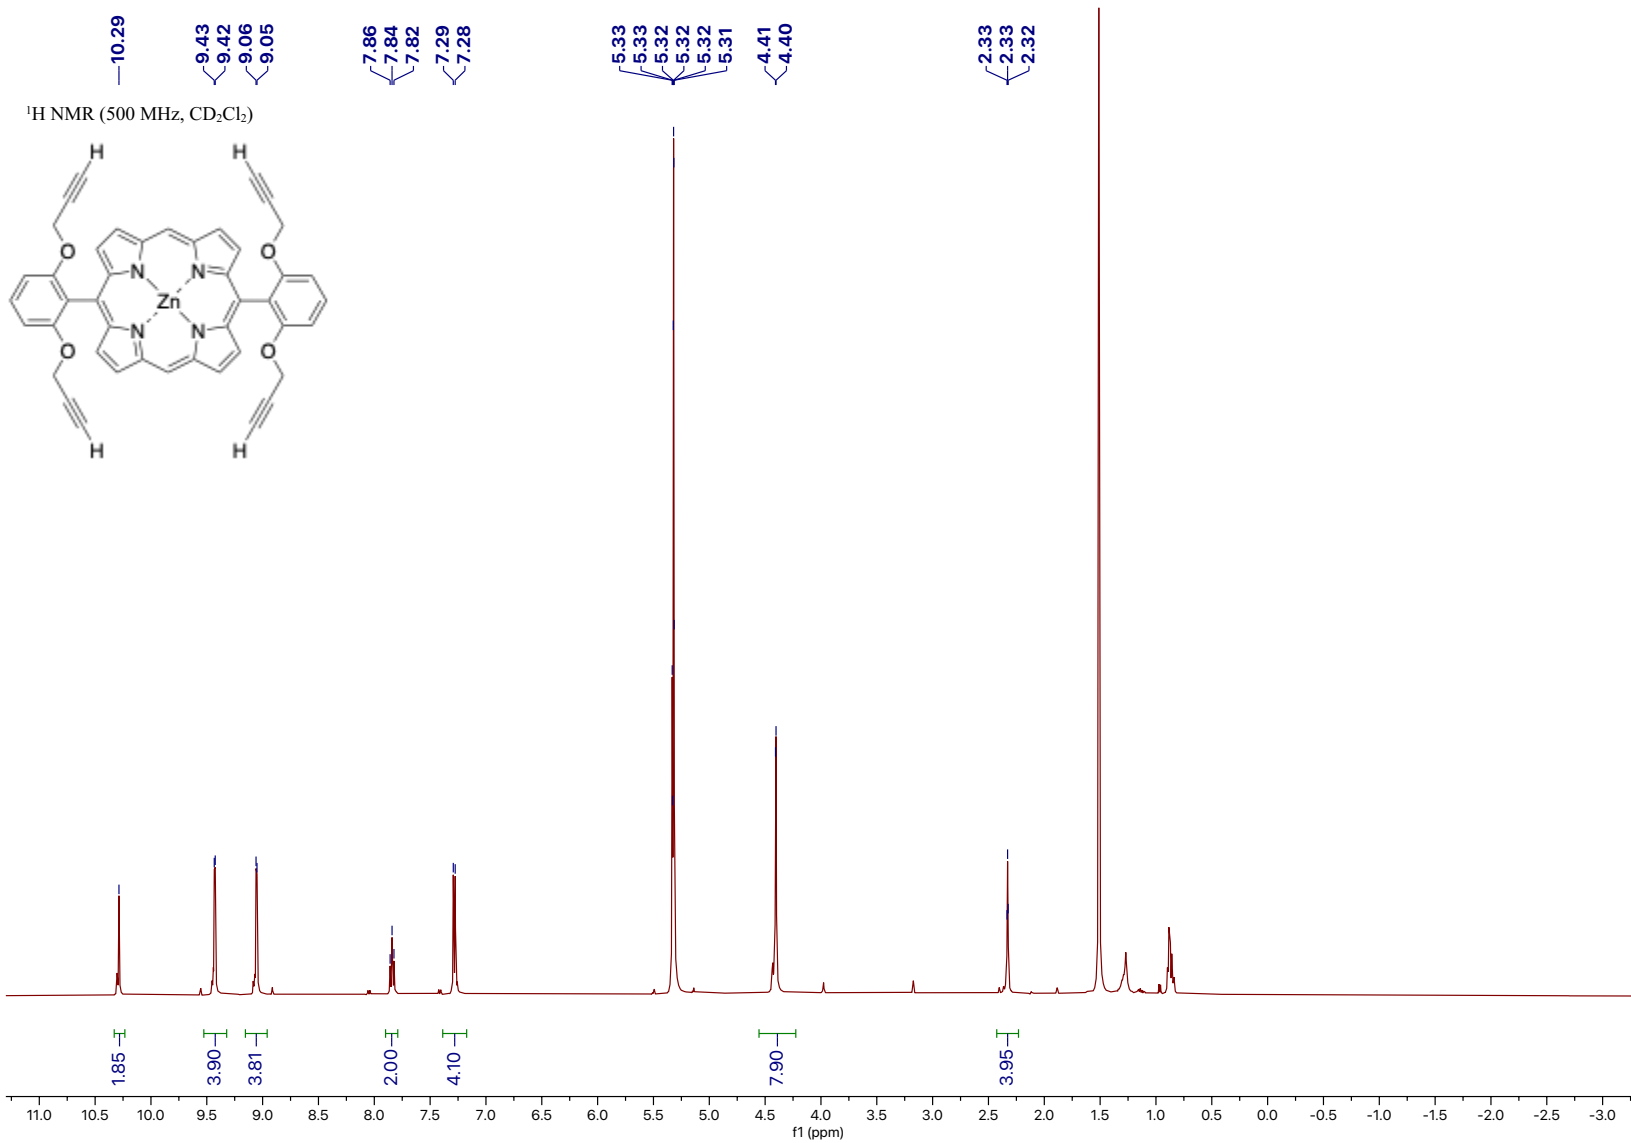

<sup>1</sup>H NMR spectrum of **Zn5** (in CD<sub>2</sub>Cl<sub>2</sub>)

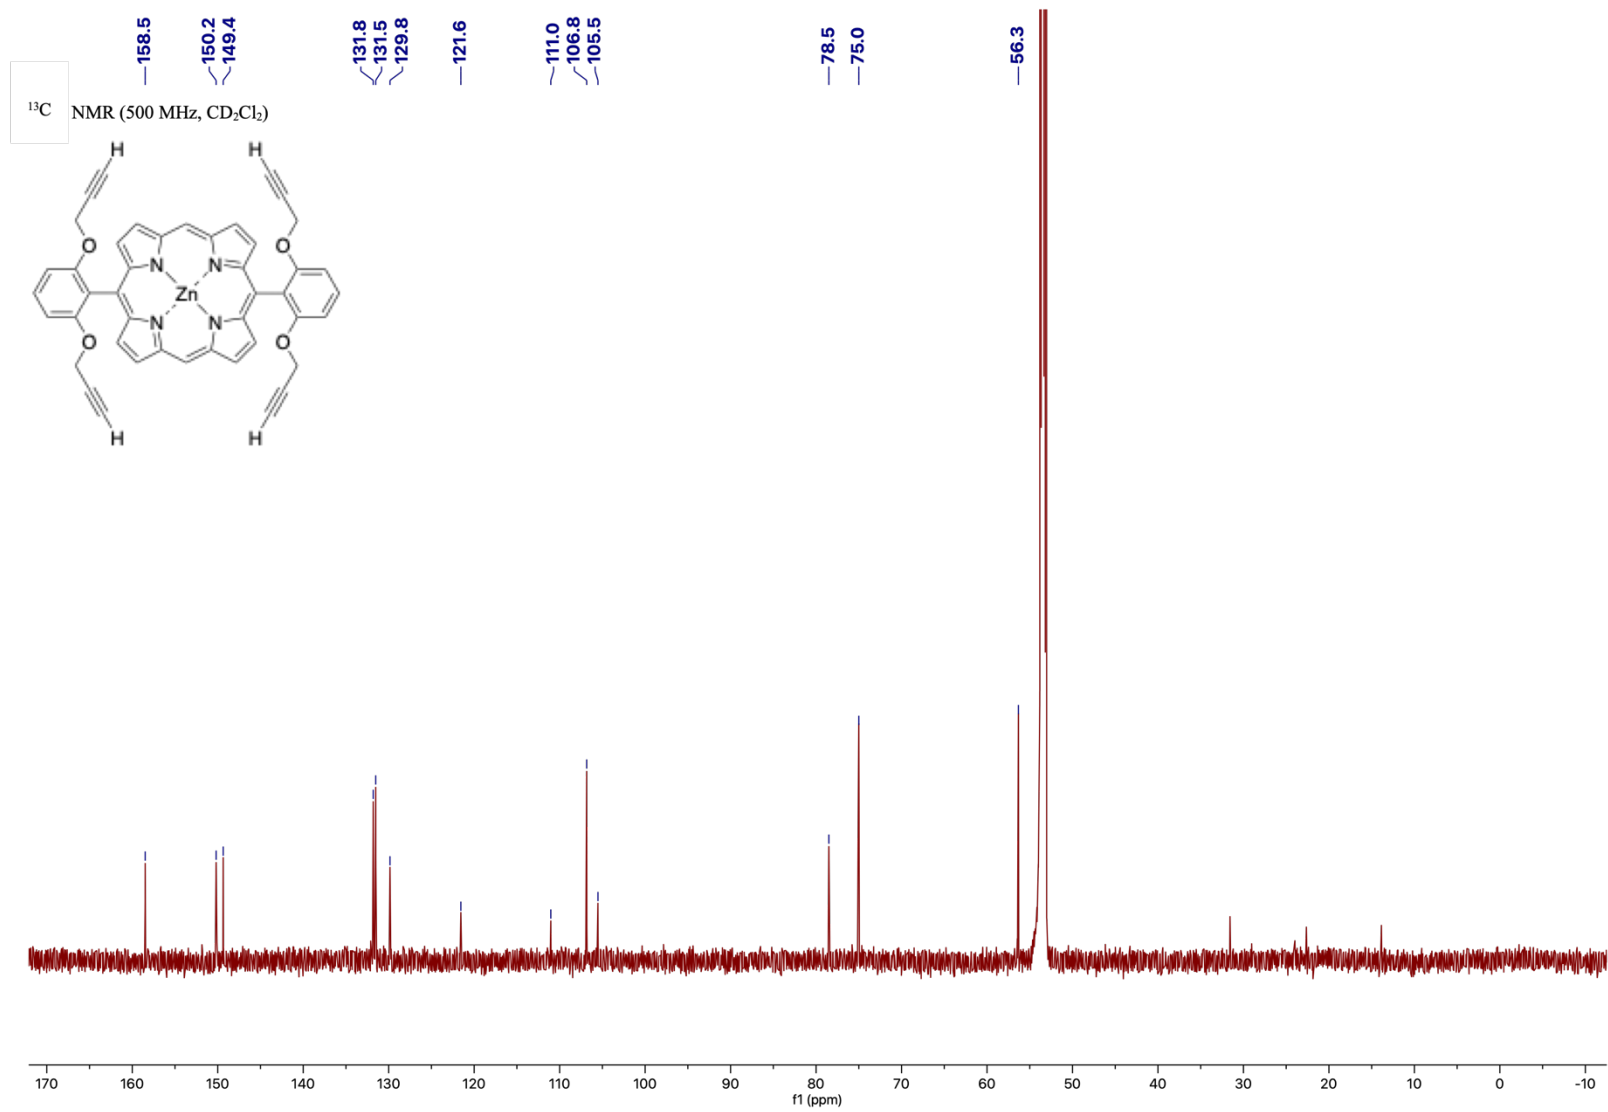

<sup>13</sup>C{<sup>1</sup>H} NMR spectrum of **Zn5** (in CD<sub>2</sub>Cl<sub>2</sub>)

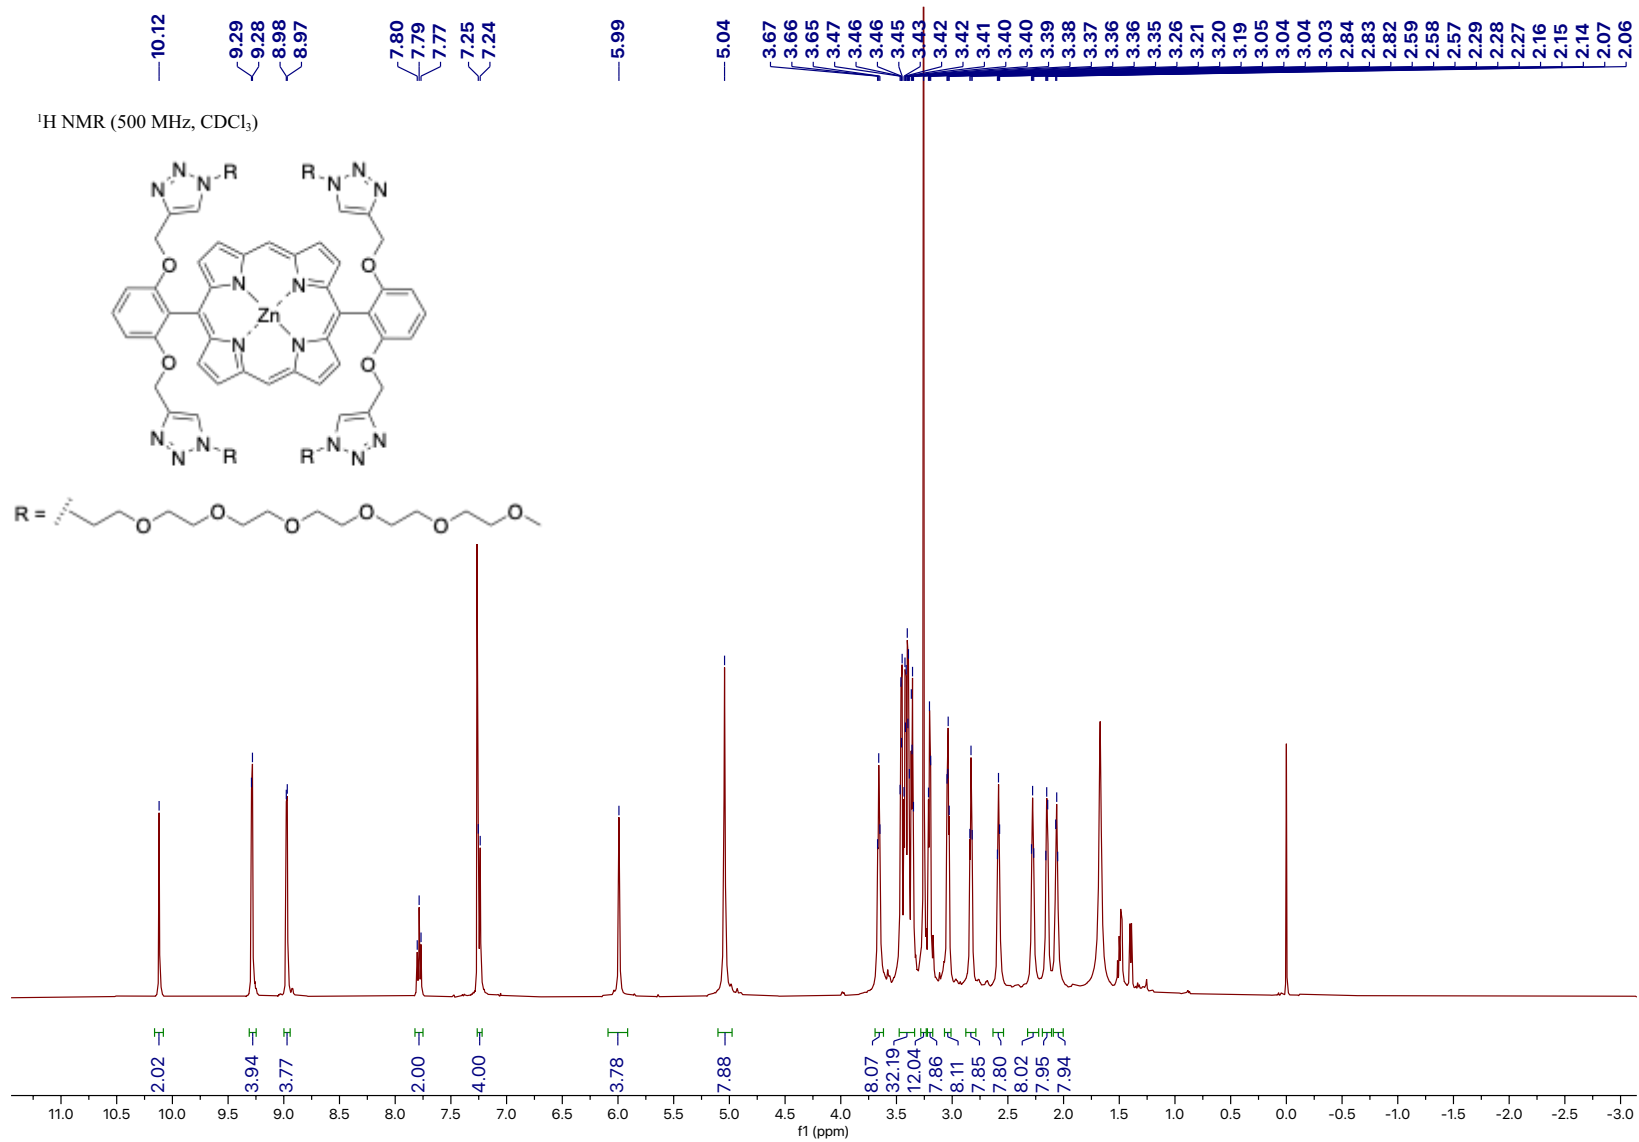

<sup>1</sup>H NMR spectrum of **Zn6** (in CDCl<sub>3</sub>)

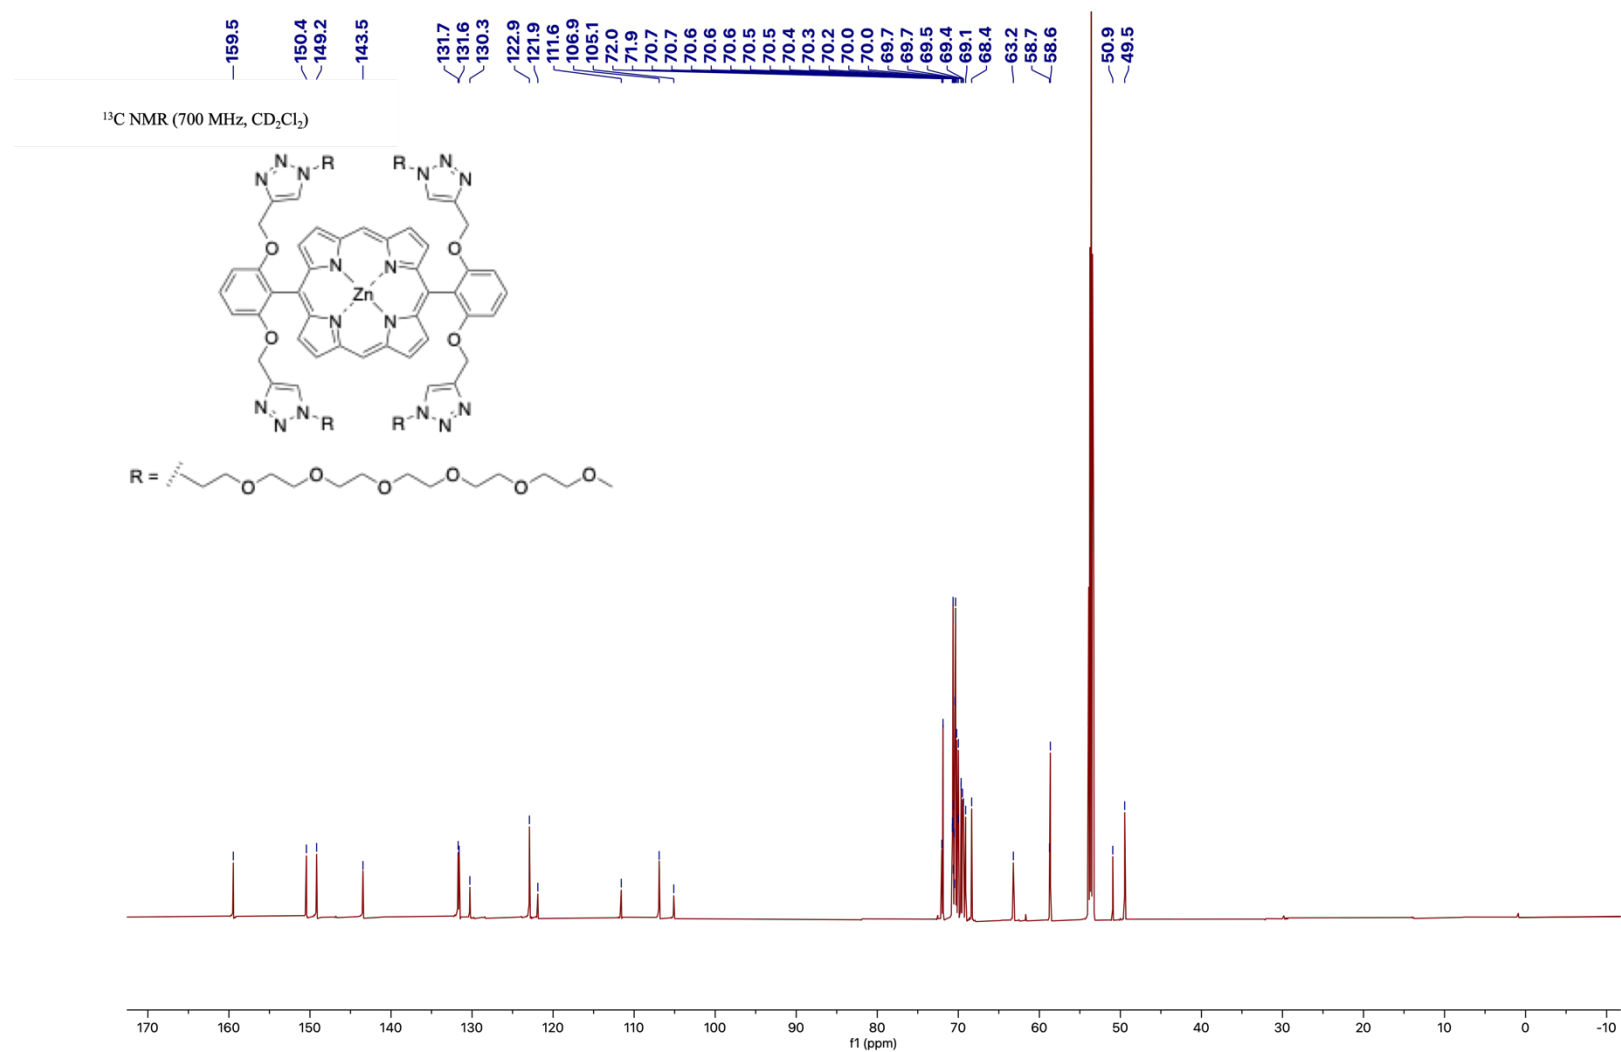

<sup>13</sup>C{<sup>1</sup>H} NMR spectrum of **Zn6** (in CD<sub>2</sub>Cl<sub>2</sub>)

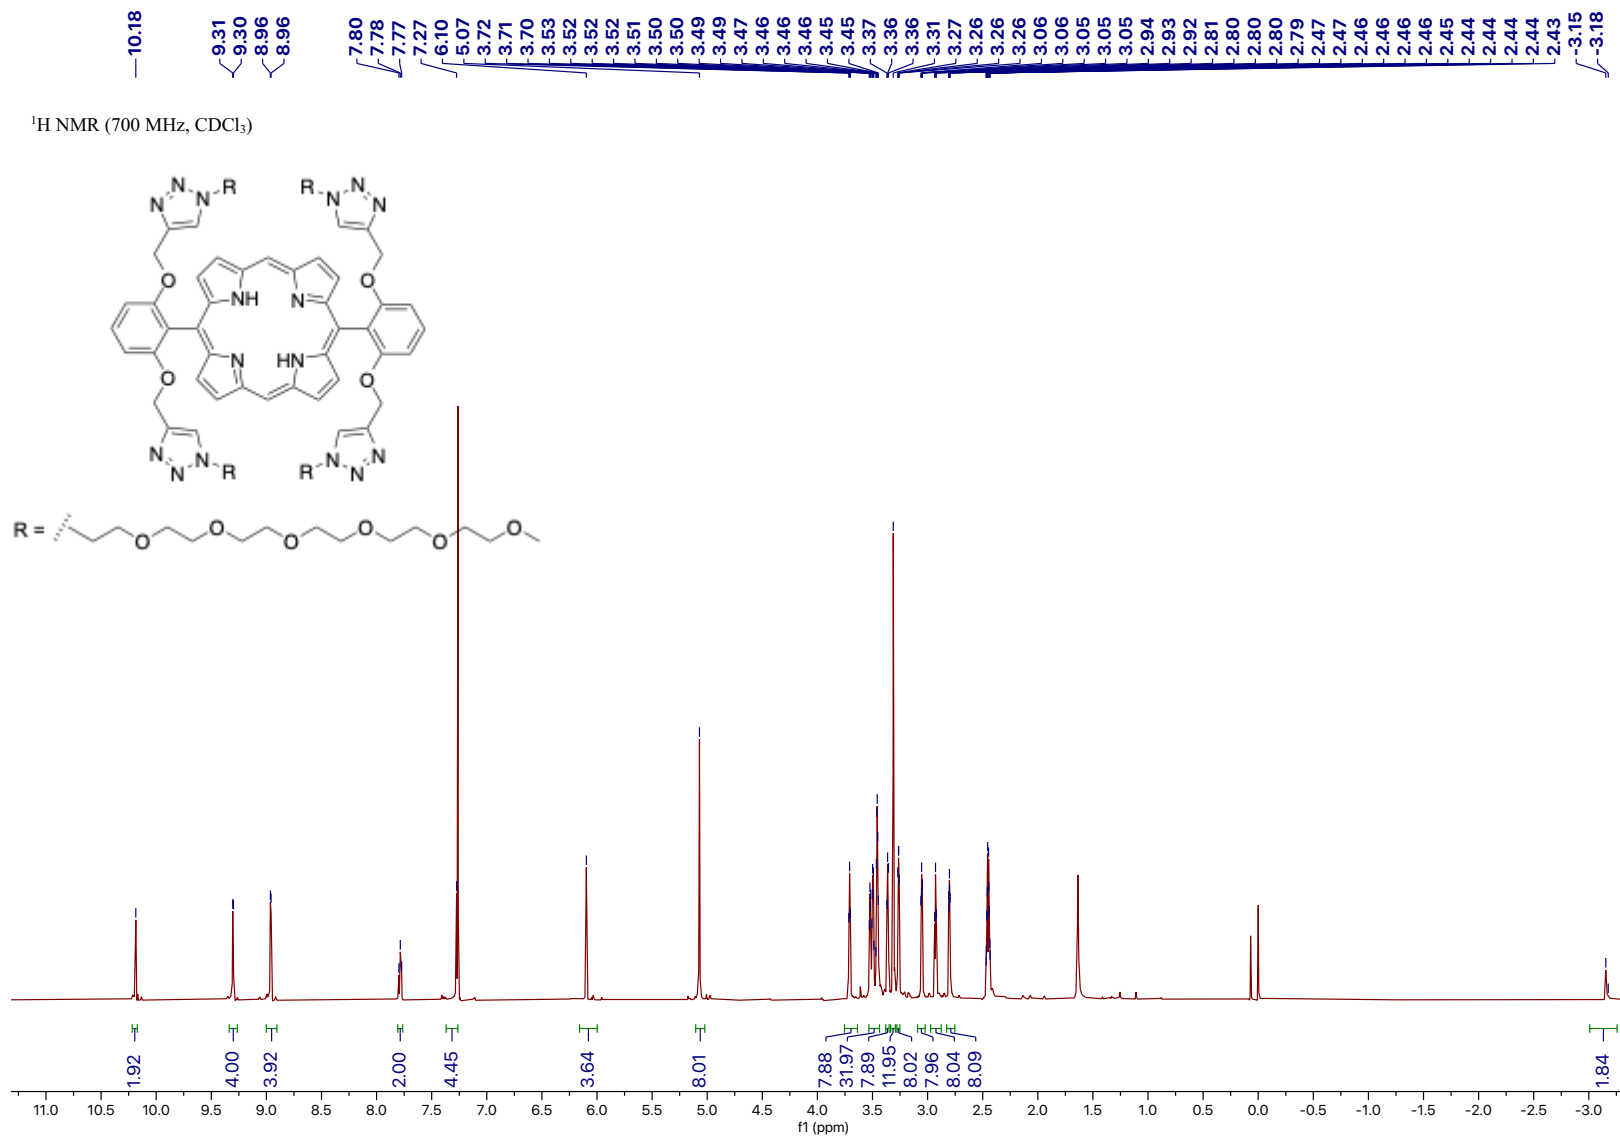

$^1\text{H}$  NMR spectrum of **6** (in  $\text{CDCl}_3$ )

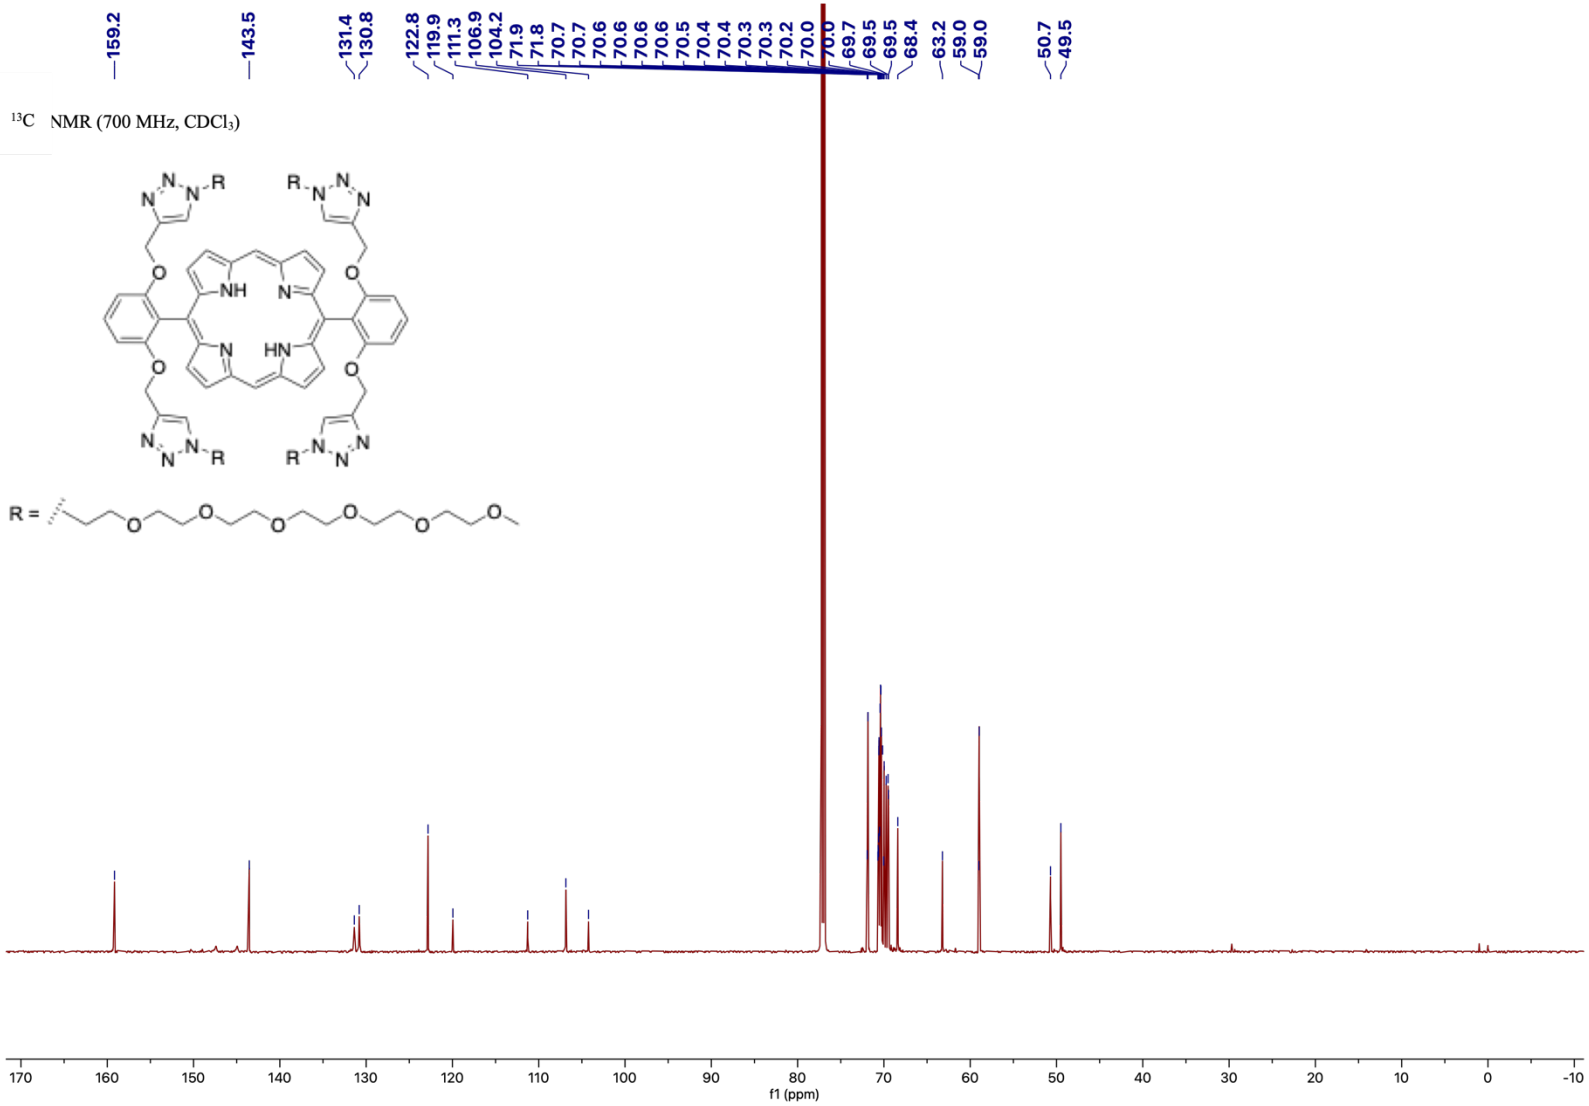

<sup>13</sup>C {<sup>1</sup>H} NMR spectrum of **6** (in CDCl<sub>3</sub>)



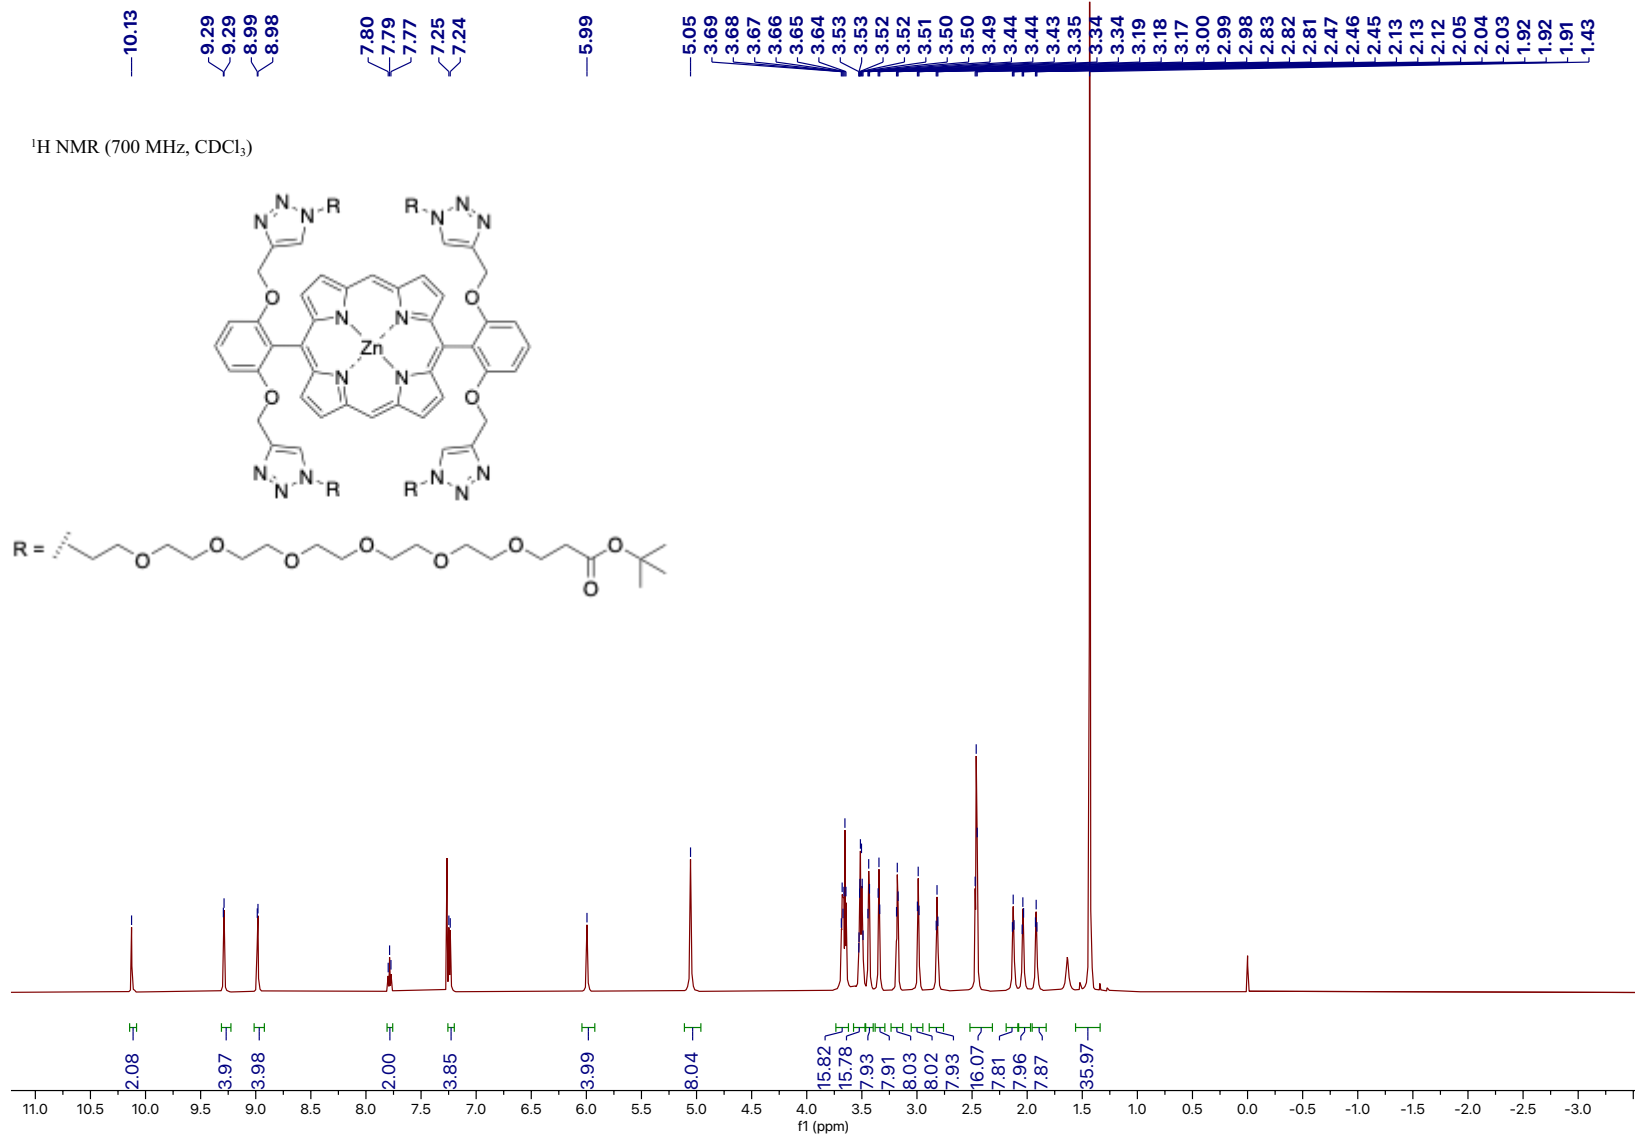

$^1\text{H NMR}$  spectrum of **Zn7** (in  $\text{CDCl}_3$ )

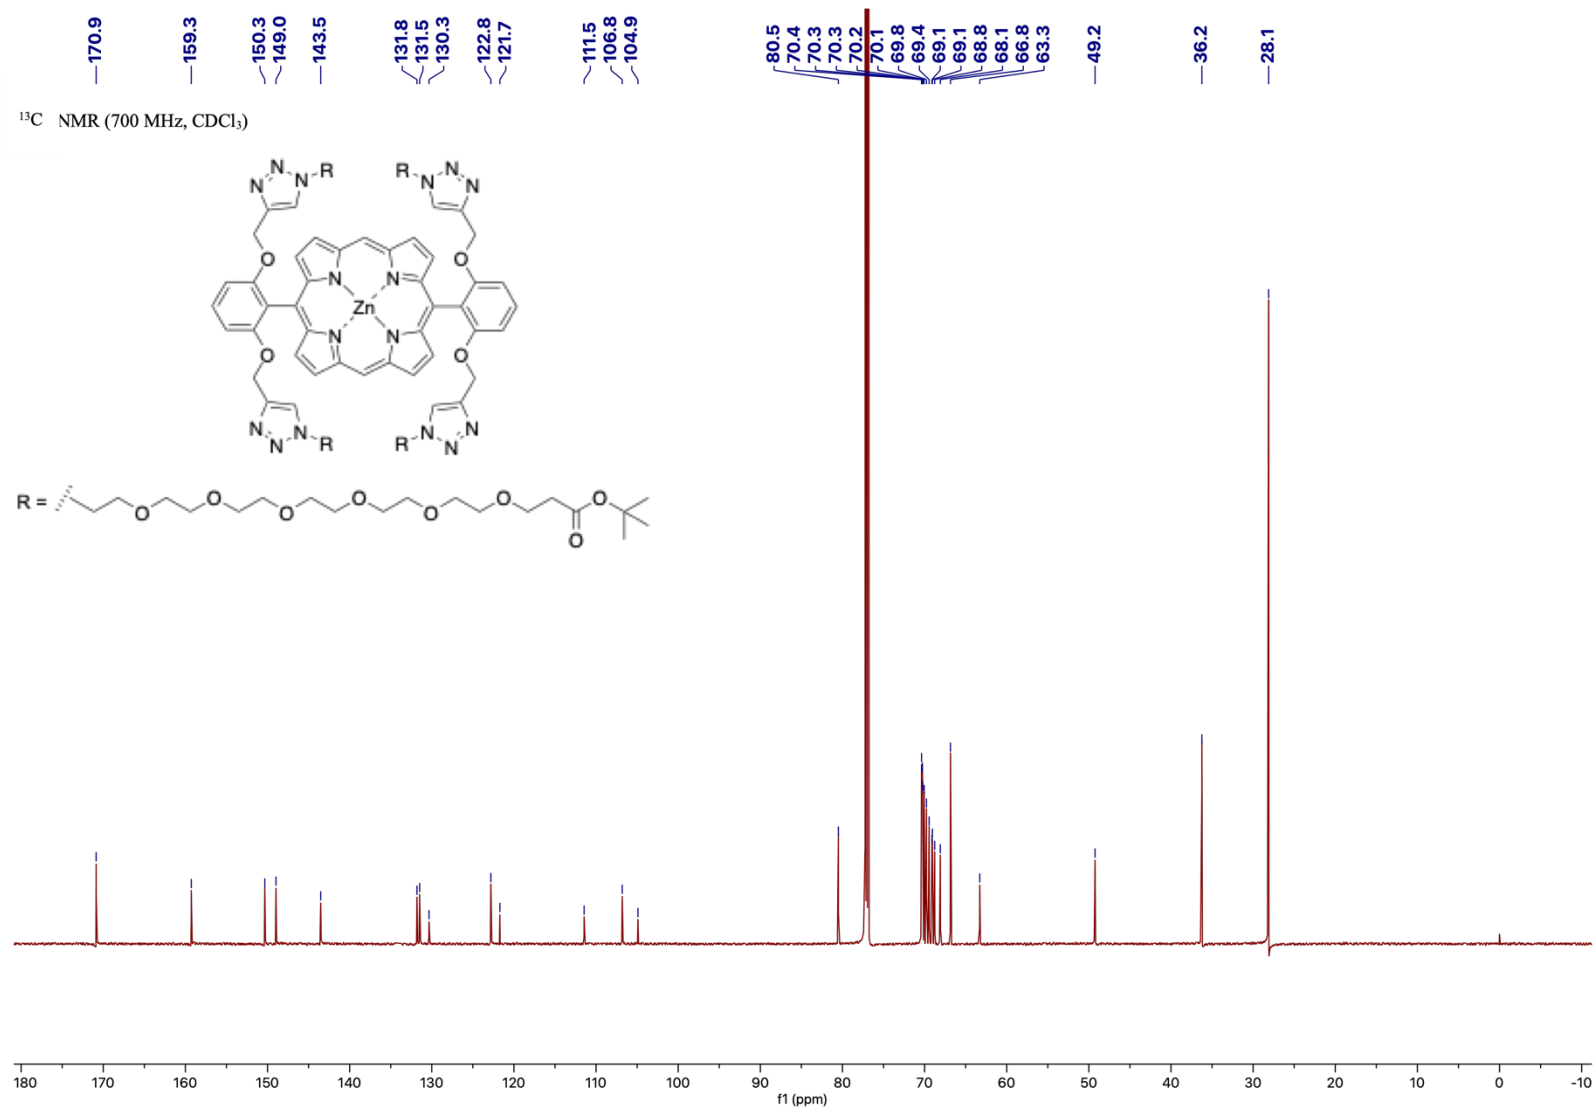

<sup>13</sup>C{<sup>1</sup>H} NMR spectrum of **Zn7** (in CDCl<sub>3</sub>)

10.21  
9.32  
9.32  
8.96  
8.96  
7.28  
7.27  
6.13  
5.09  
3.72  
3.71  
3.70  
3.69  
3.69  
3.65  
3.64  
3.63  
3.62  
3.54  
3.54  
3.53  
3.51  
3.51  
3.50  
3.49  
3.48  
3.47  
3.47  
3.46  
3.45  
3.45  
3.43  
3.43  
3.42  
3.41  
3.40  
3.39  
3.38  
3.37  
3.36  
3.36  
3.30  
3.28  
3.28  
3.27  
3.26  
3.18  
3.17  
3.17  
3.16  
3.15  
3.05  
3.04  
2.96  
2.96  
2.95  
2.94  
2.90  
2.89  
2.88  
2.87  
2.87  
2.69  
2.68  
2.68  
2.54  
2.50  
2.49  
2.48  
2.39  
2.38  
2.34  
2.33  
2.32

$^1\text{H NMR}$  (700 MHz,  $\text{CDCl}_3$ )

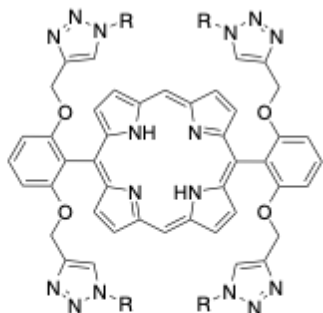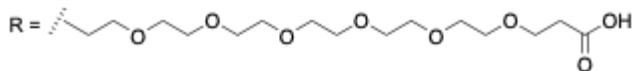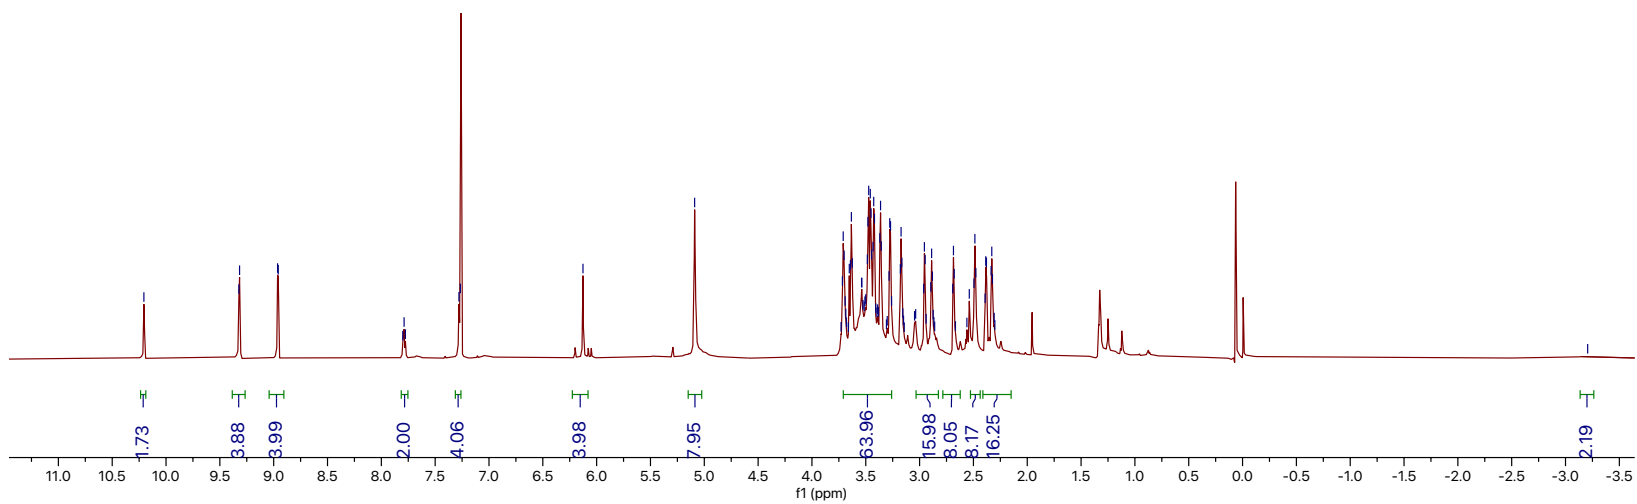

$^1\text{H NMR}$  spectrum of **8** (in  $\text{CDCl}_3$ )

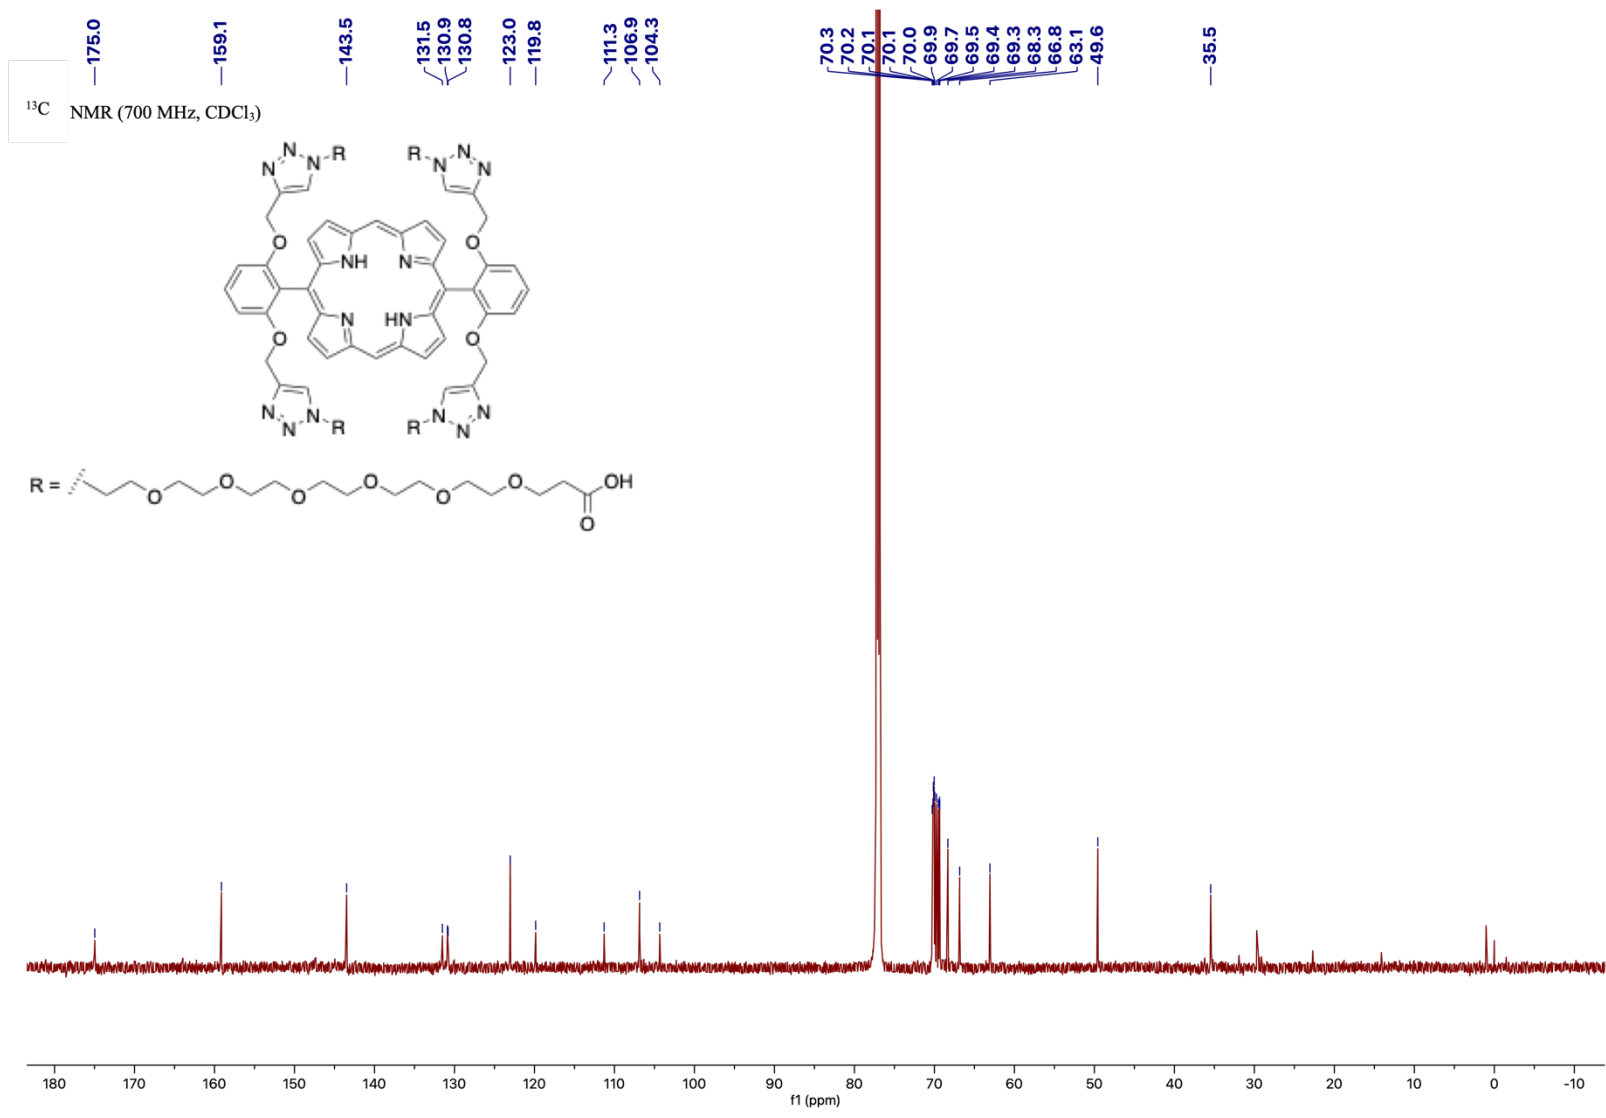

<sup>13</sup>C {<sup>1</sup>H} NMR spectrum of **8** (in CDCl<sub>3</sub>)

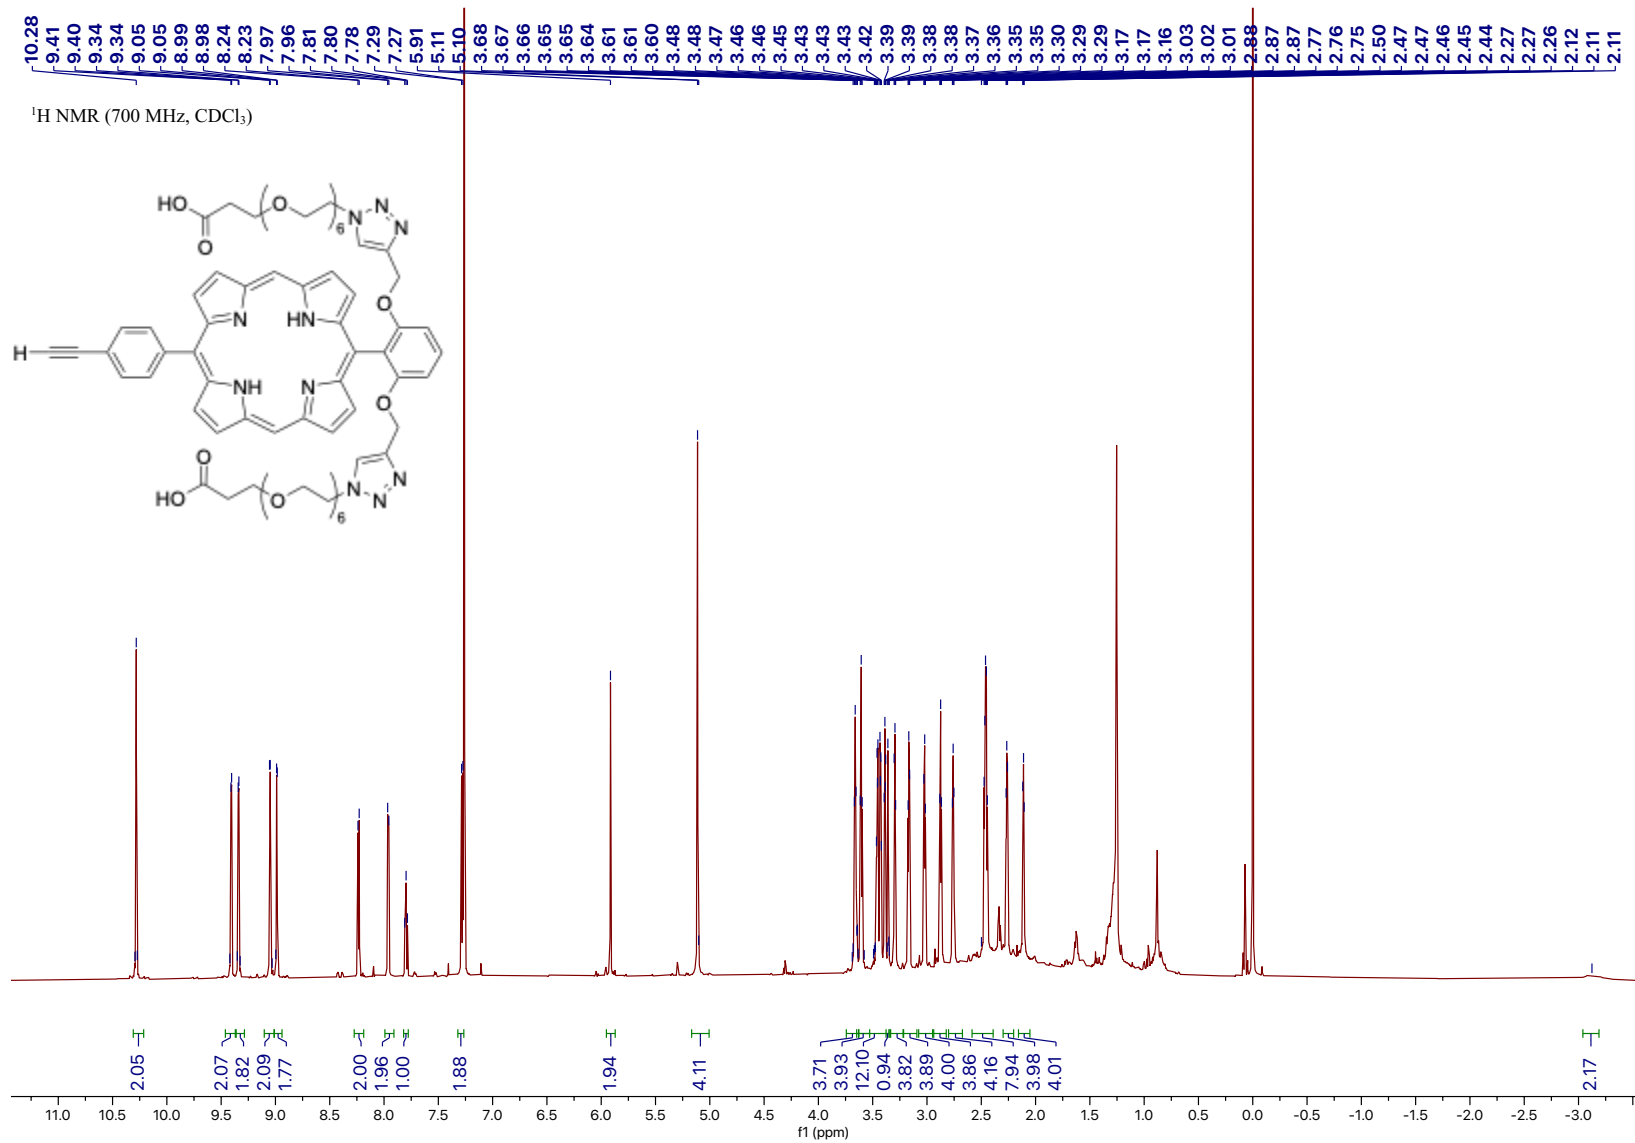

<sup>1</sup>H NMR spectrum of **11** (in CDCl<sub>3</sub>)

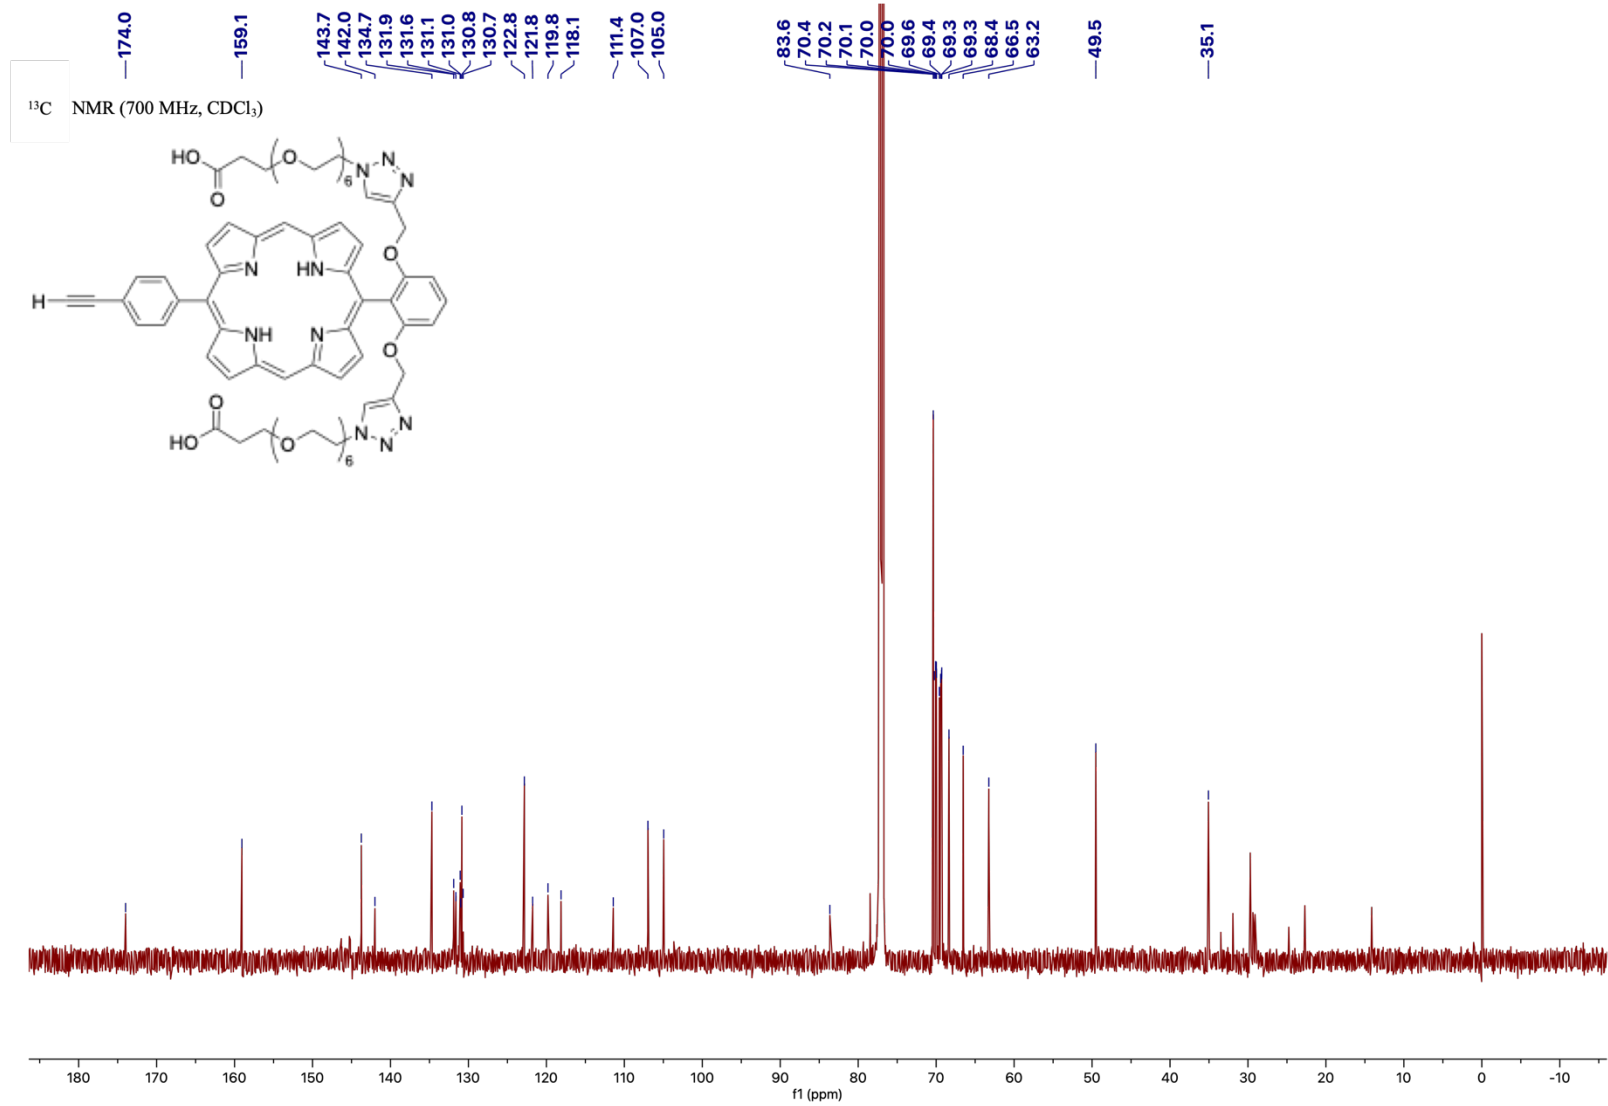

<sup>13</sup>C {<sup>1</sup>H} NMR spectrum of **11** (in CDCl<sub>3</sub>)

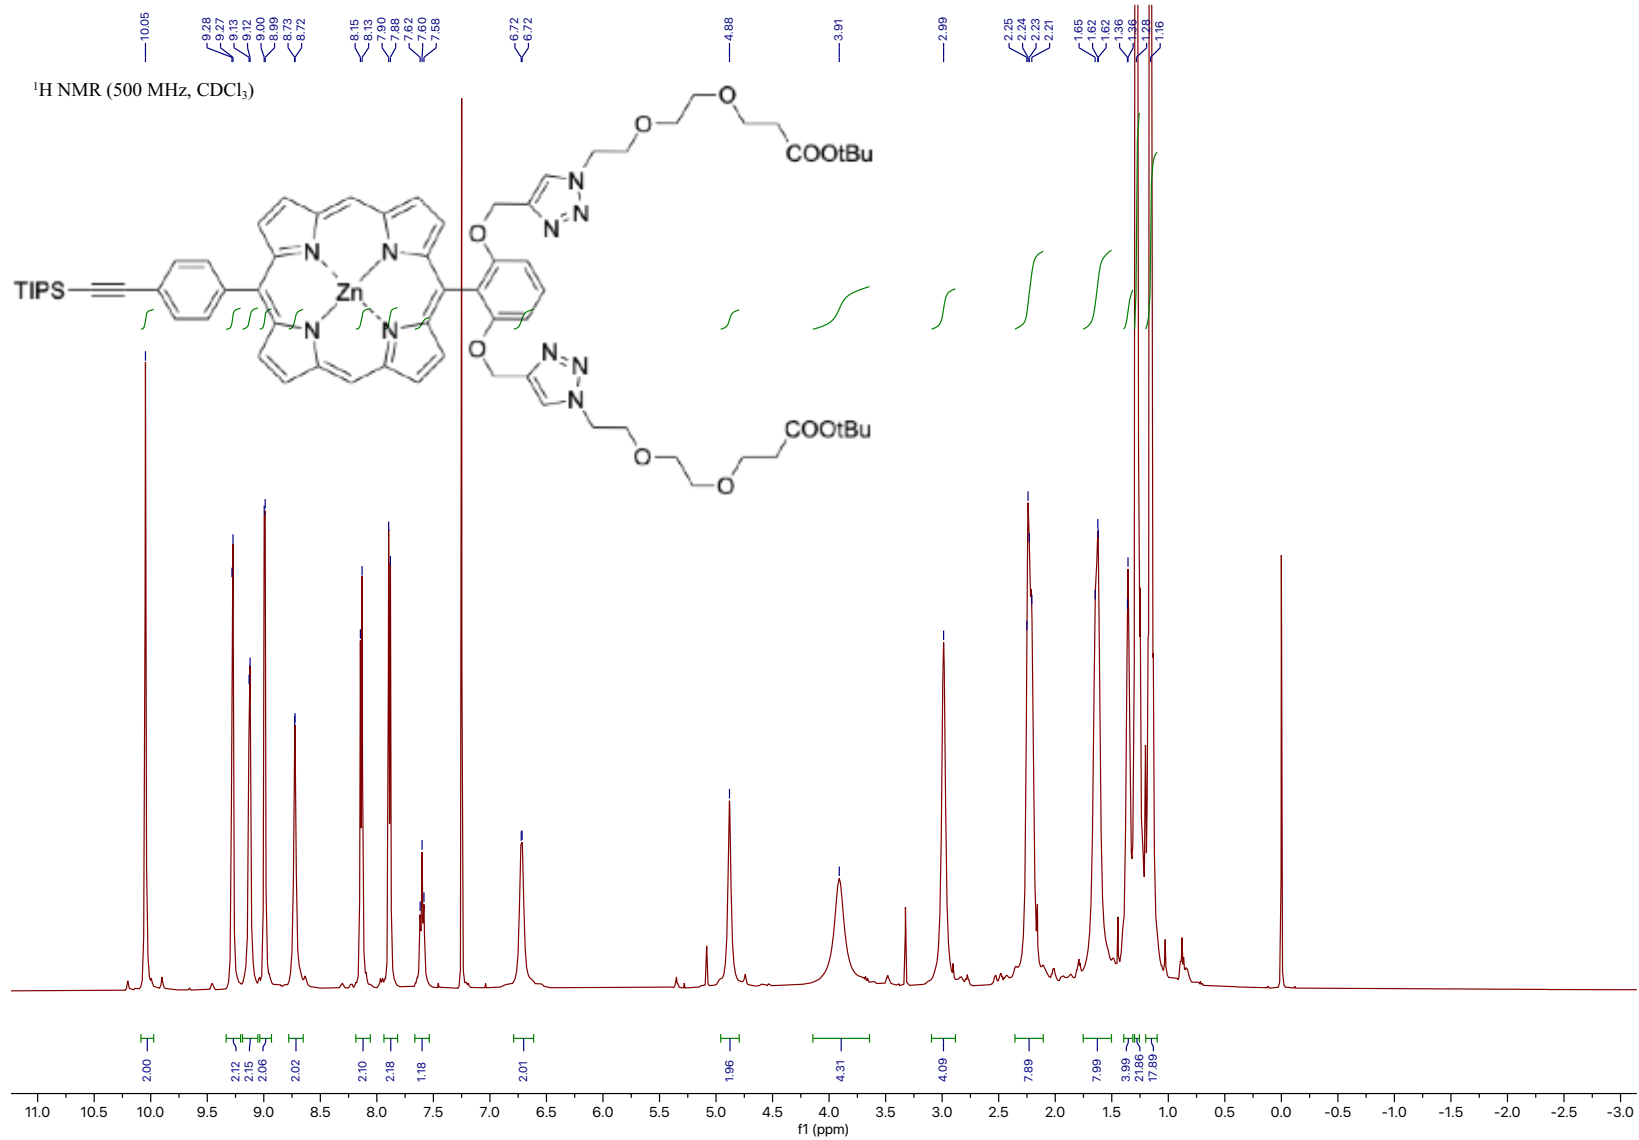

<sup>1</sup>H NMR spectrum of **Zn12** (in CDCl<sub>3</sub>)

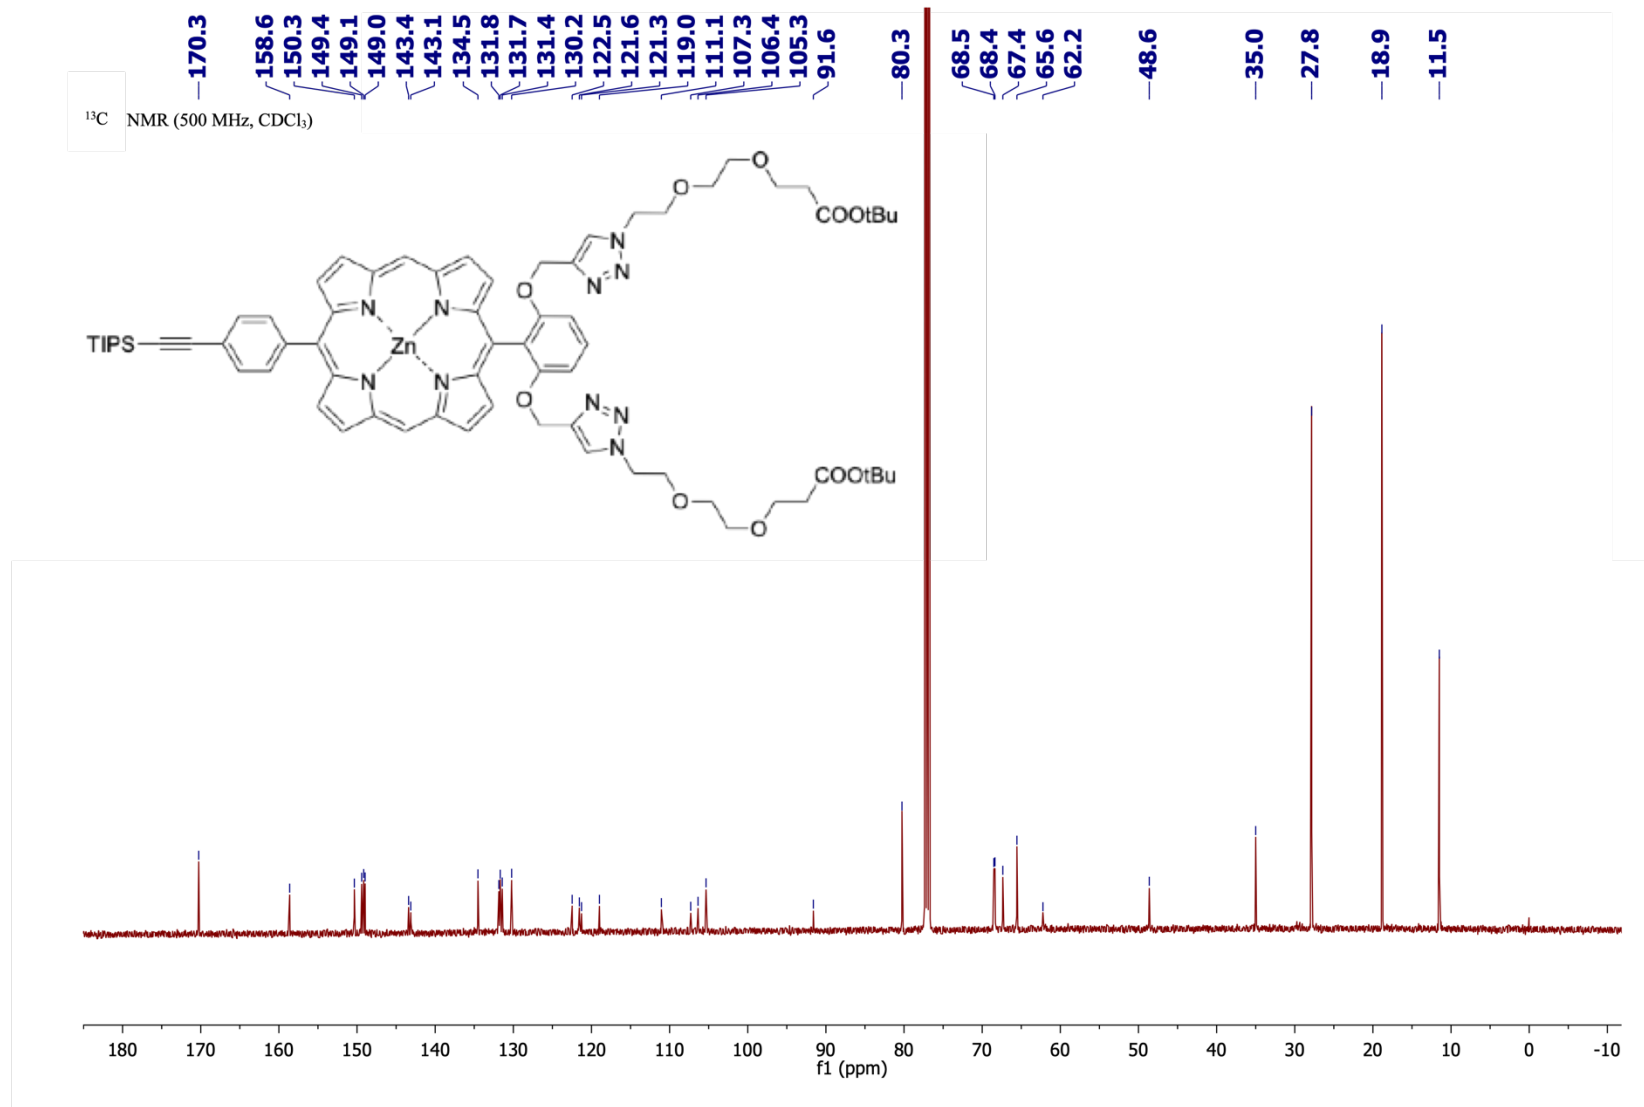

<sup>13</sup>C{<sup>1</sup>H} NMR spectrum of **Zn12** (in CDCl<sub>3</sub>)



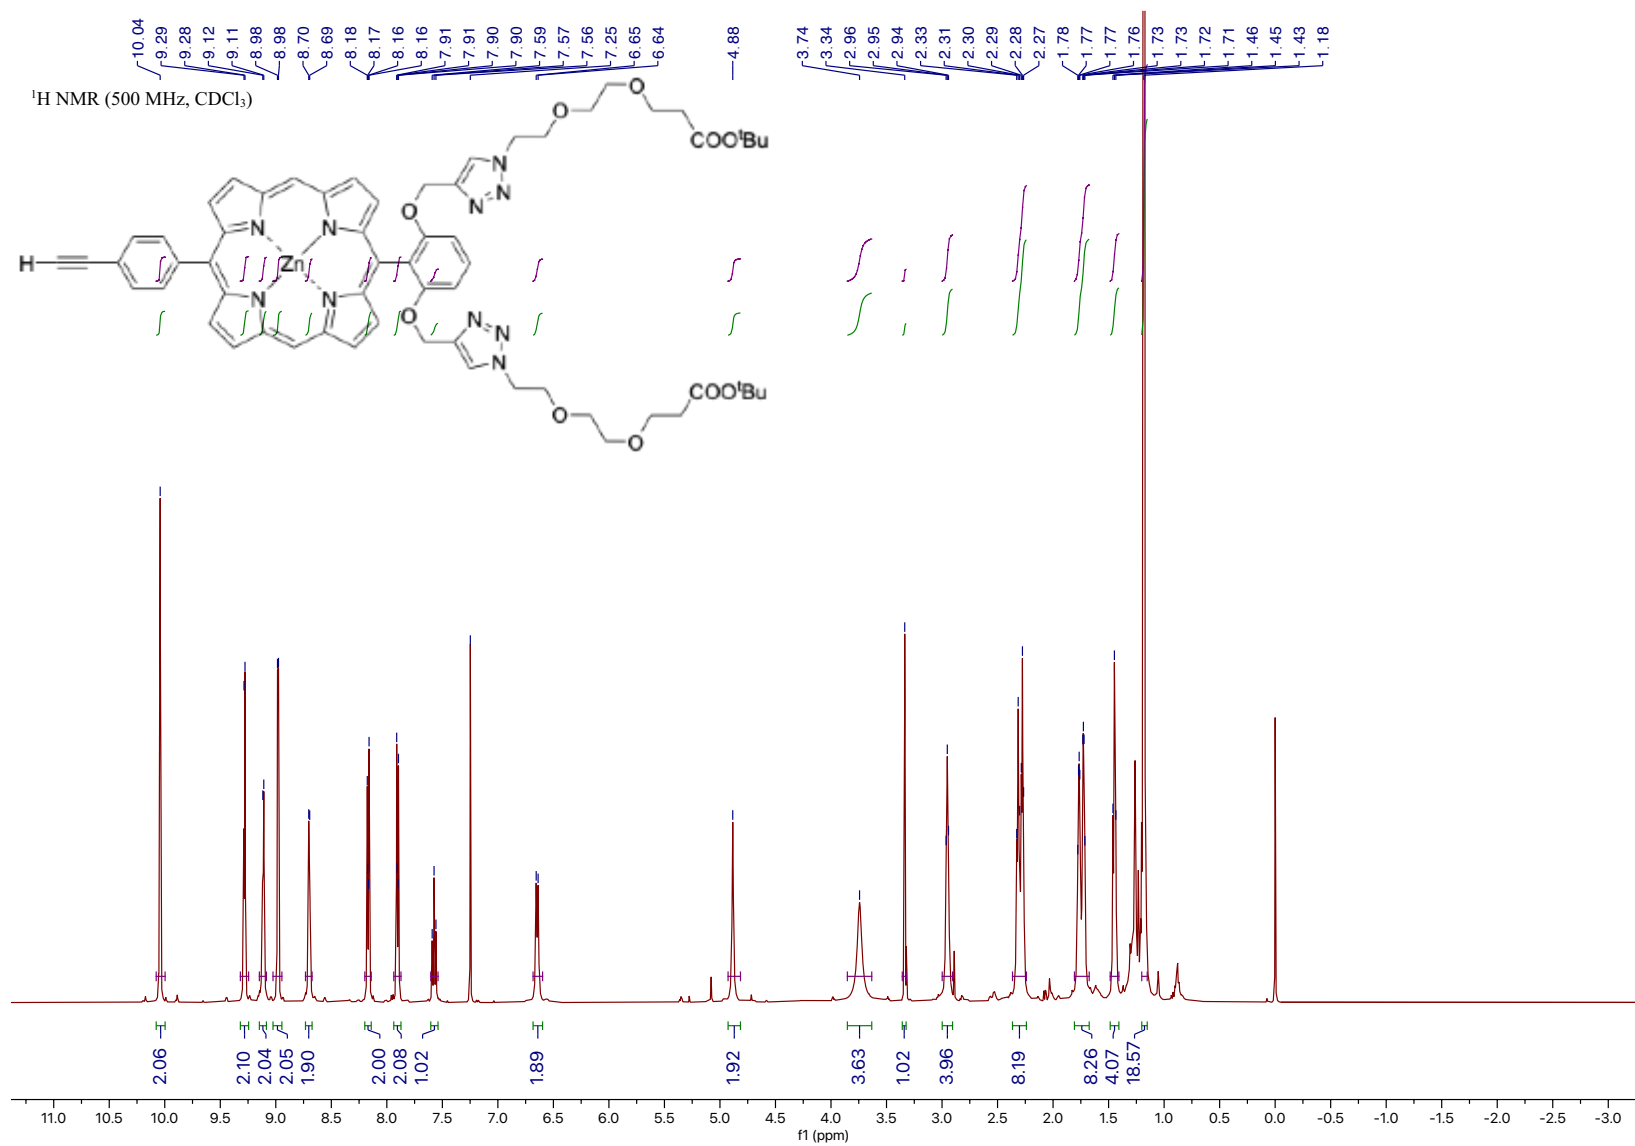

<sup>1</sup>H NMR spectrum of **Zn13** (in CDCl<sub>3</sub>)

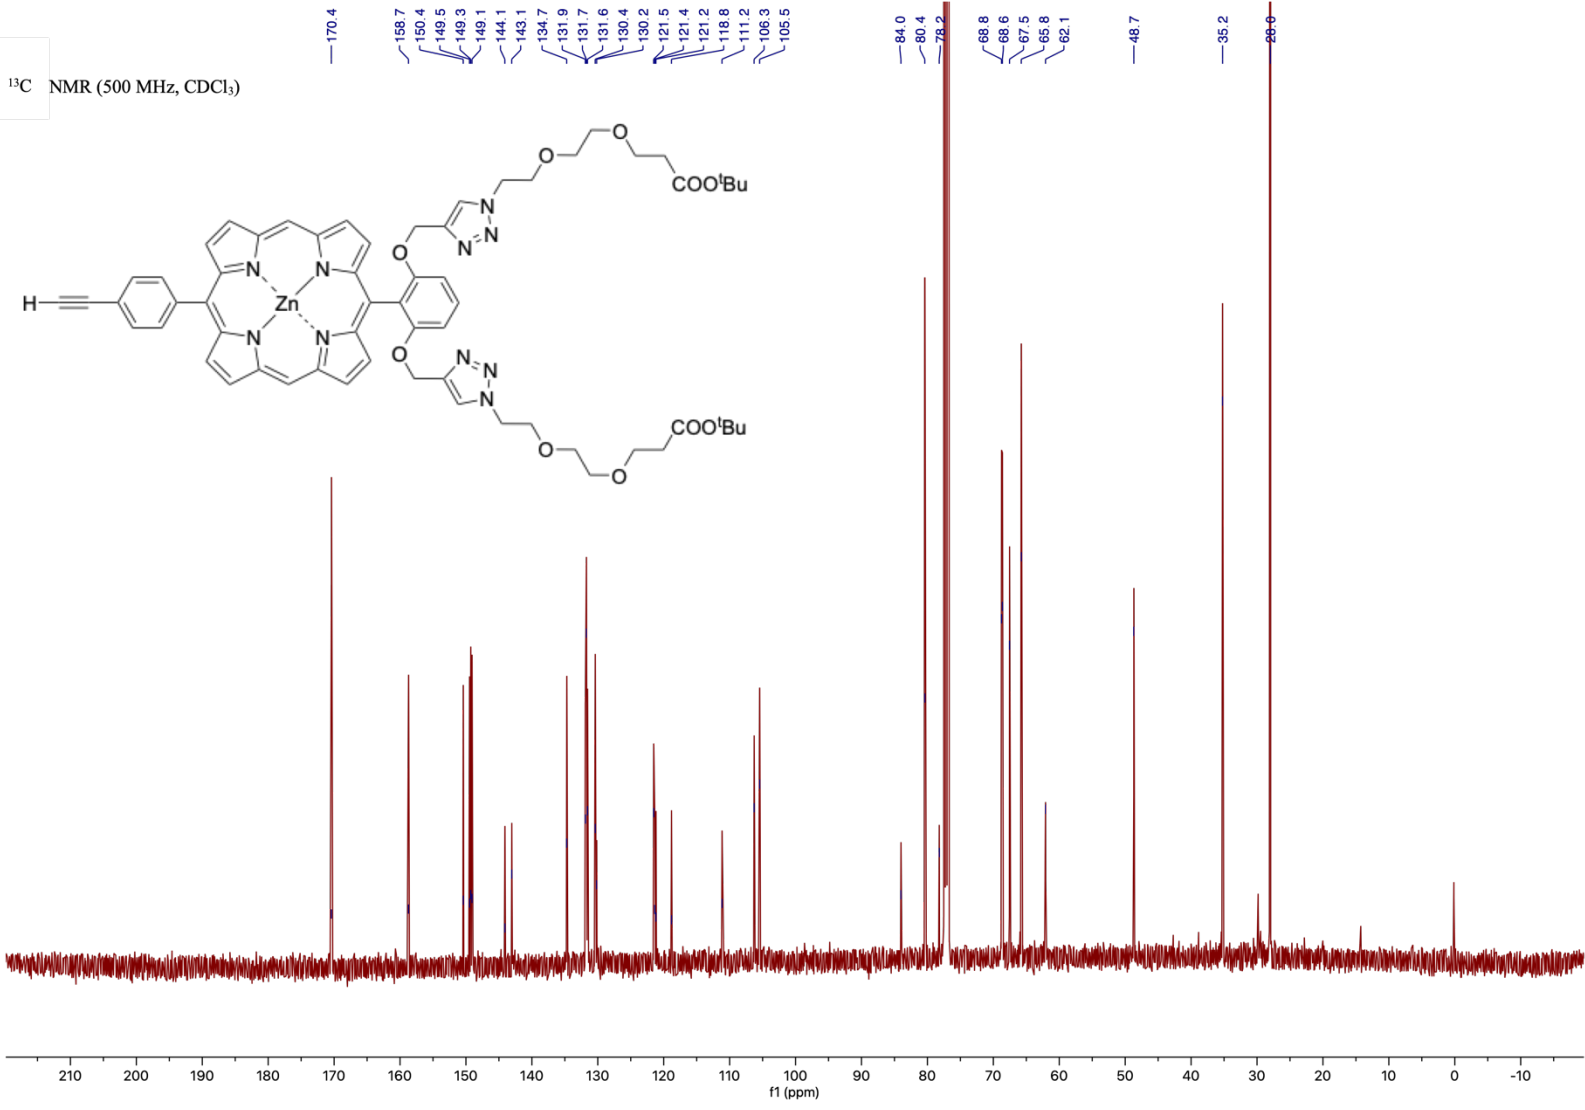

<sup>13</sup>C{<sup>1</sup>H} NMR spectrum of **Zn13** (in CDCl<sub>3</sub>)

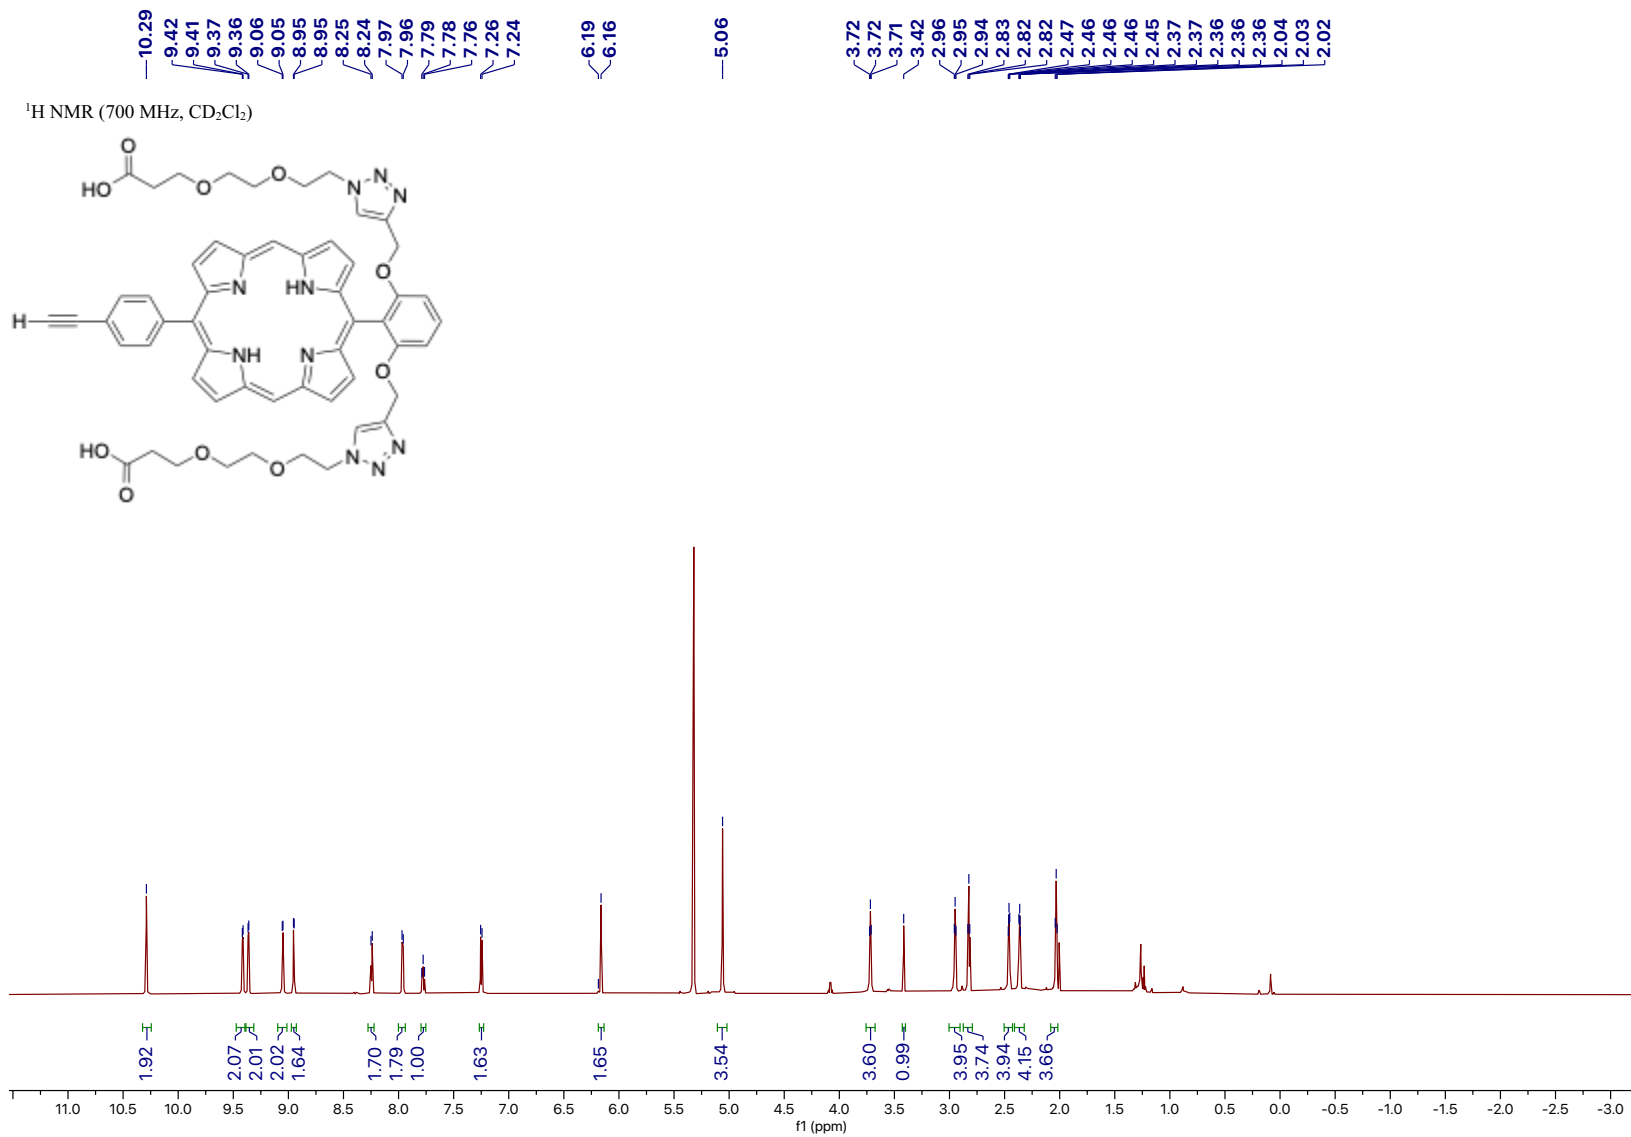

<sup>1</sup>H NMR spectrum of **14** (in CD<sub>2</sub>Cl<sub>2</sub>)

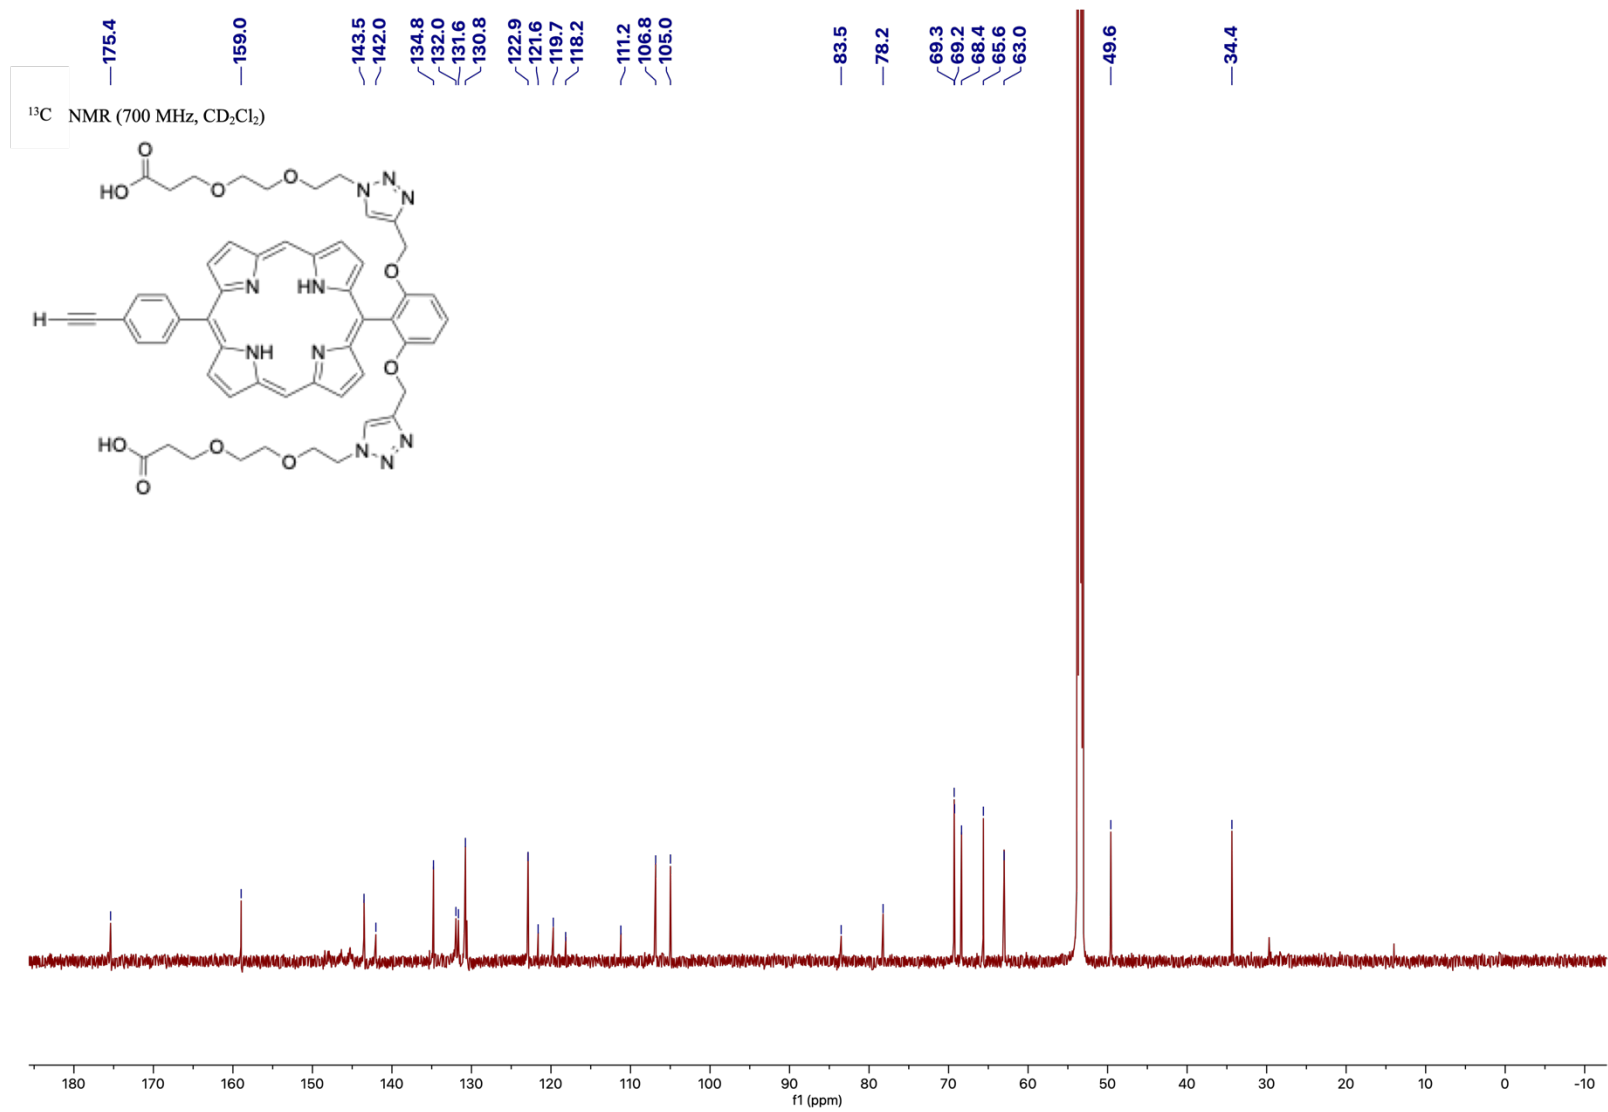

<sup>13</sup>C {<sup>1</sup>H} NMR spectrum of **14** (in CD<sub>2</sub>Cl<sub>2</sub>)

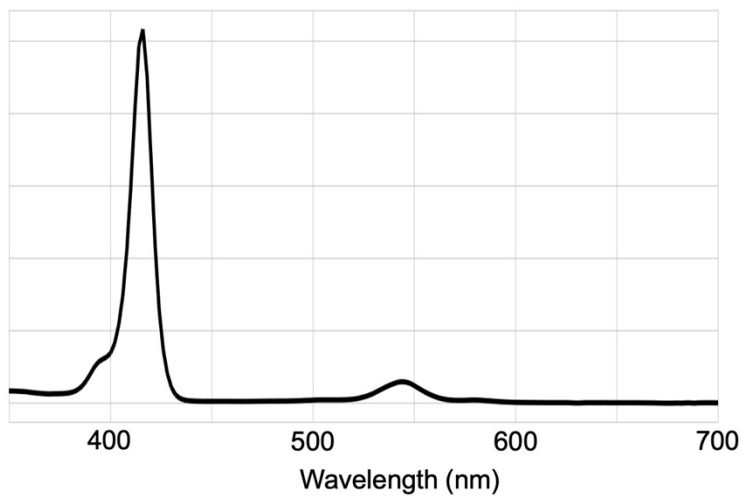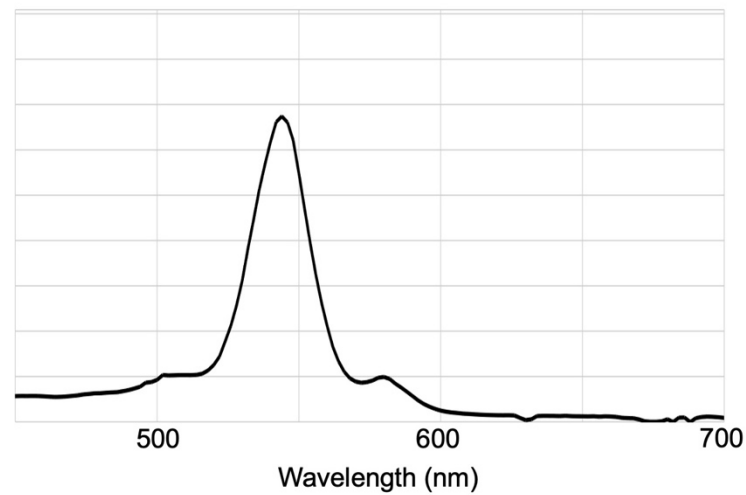

Absorption spectrum of **Zn<sup>2+</sup>** (in toluene)

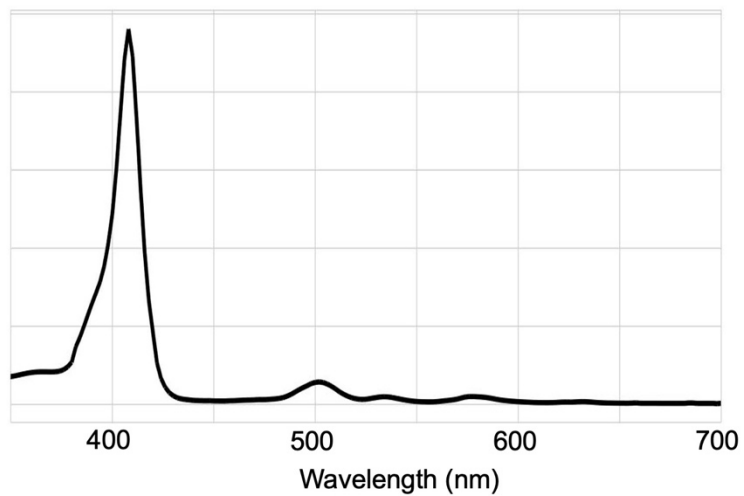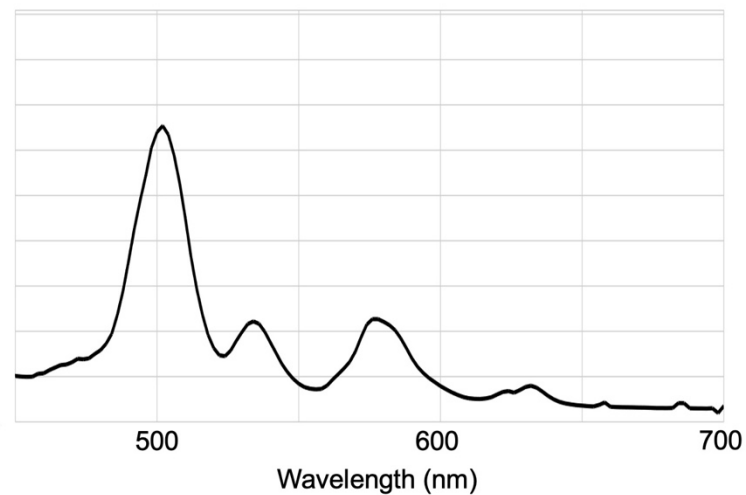

Absorption spectrum of **5** (in toluene)

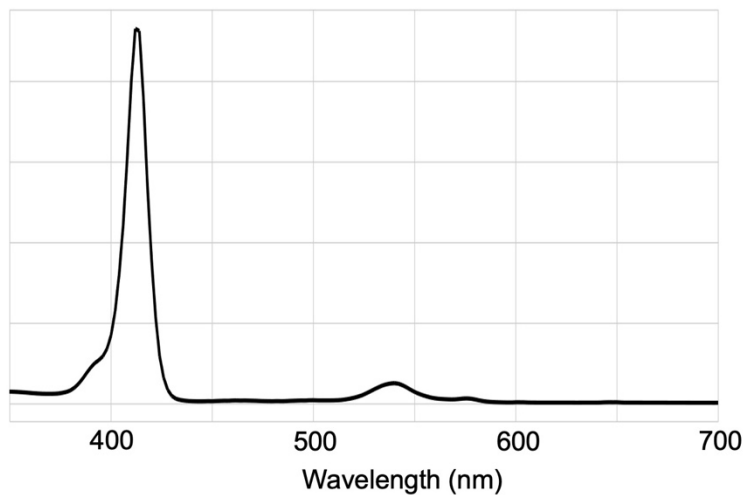

Absorption spectrum of **Zn5** (in toluene)

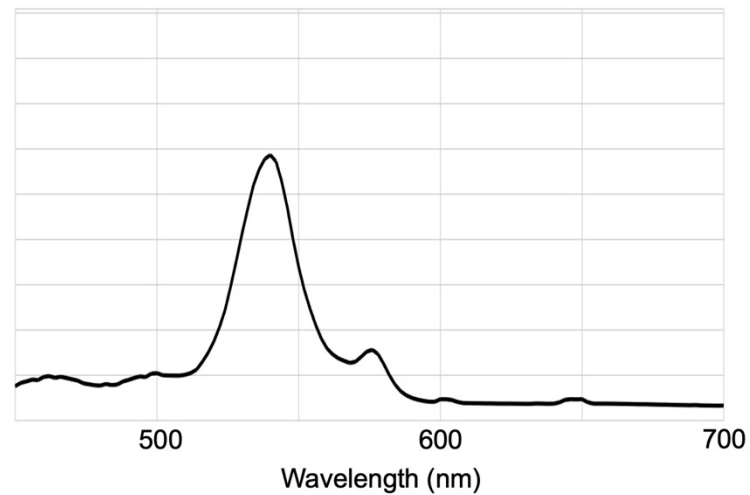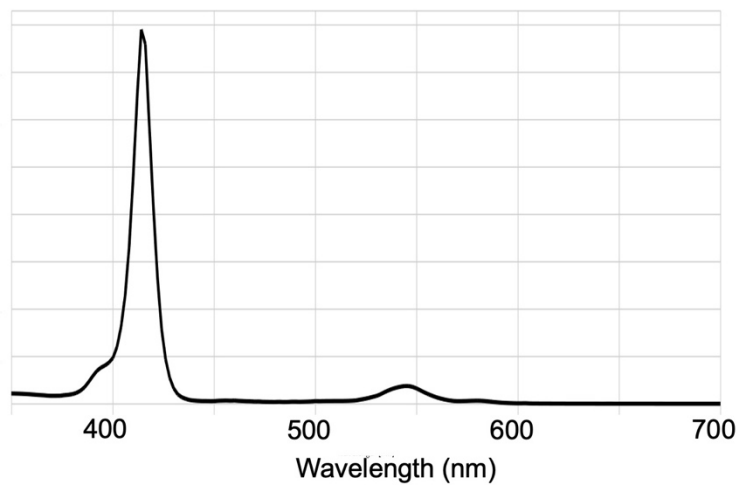

Absorption spectrum of **Zn6** (in toluene)

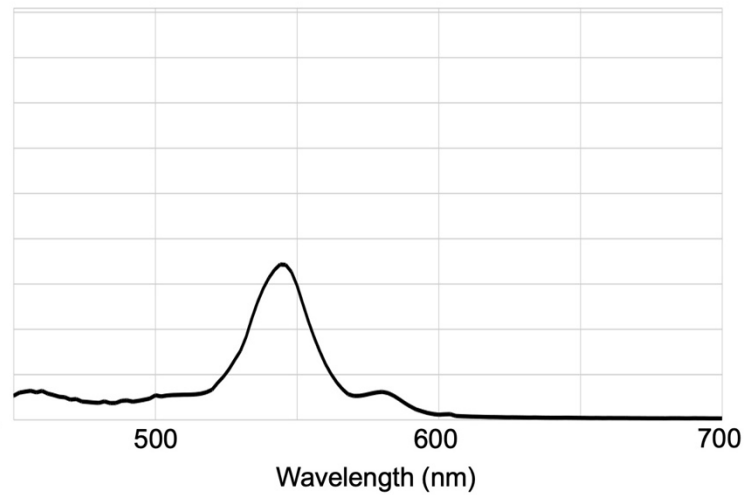

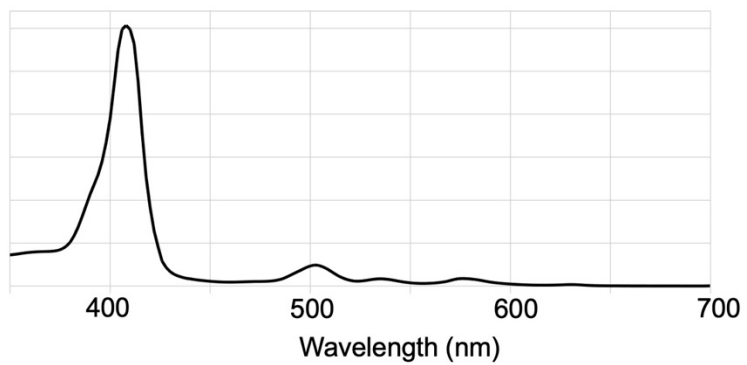

Absorption spectrum of **6** (in toluene)

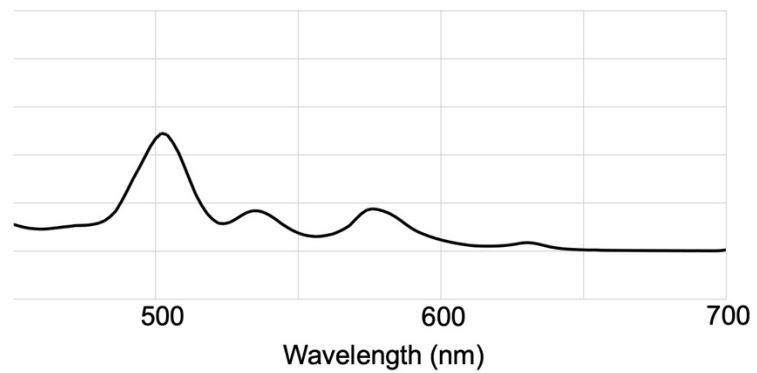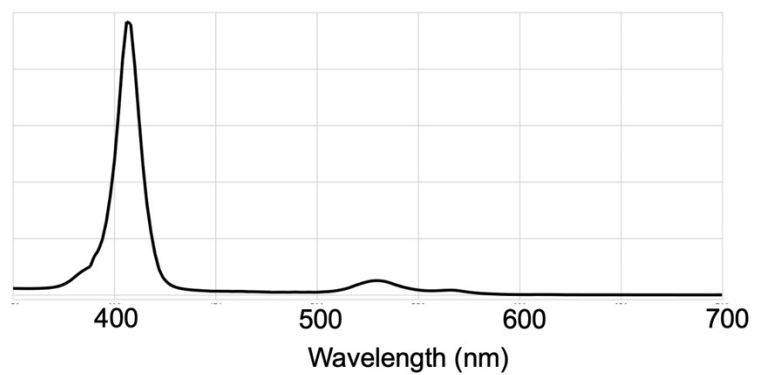

Absorption spectrum of **Cu6** (in toluene)

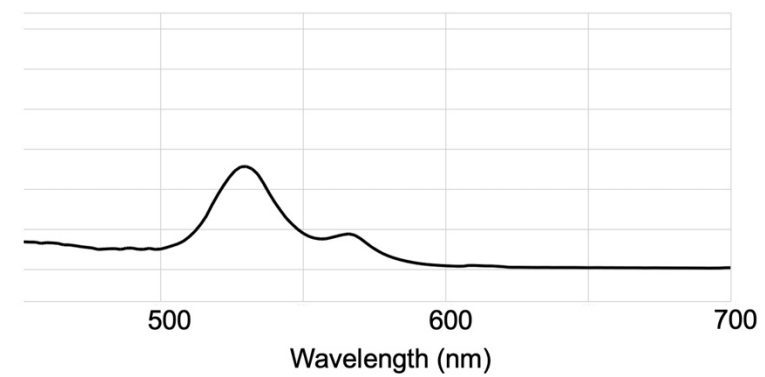

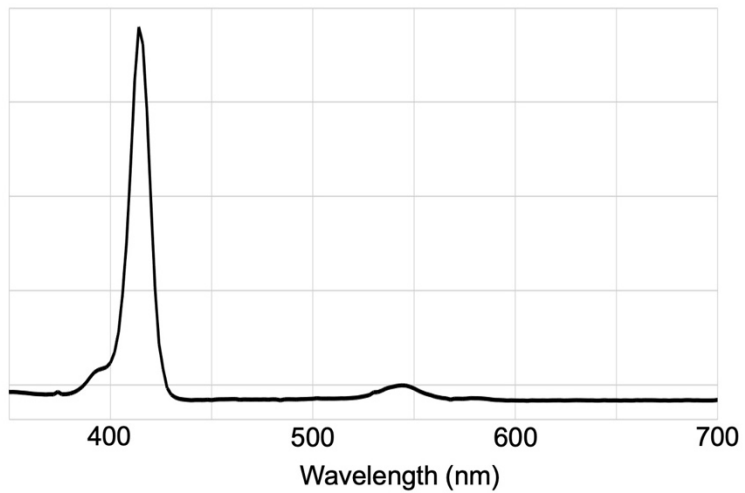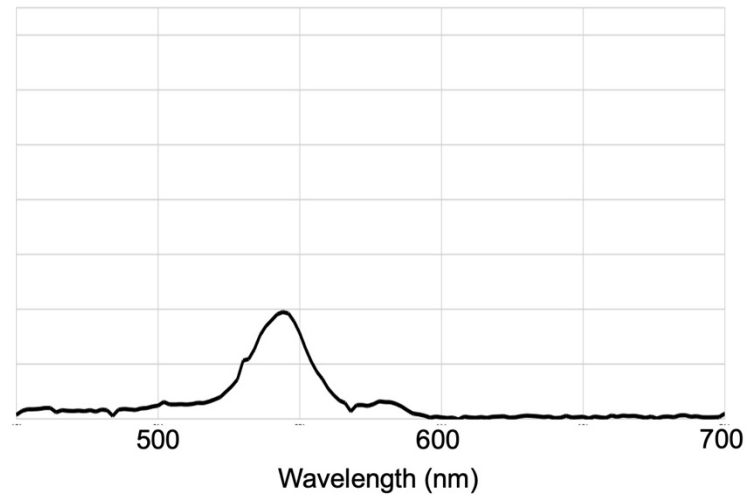

Absorption spectrum of **Zn7** (in toluene)

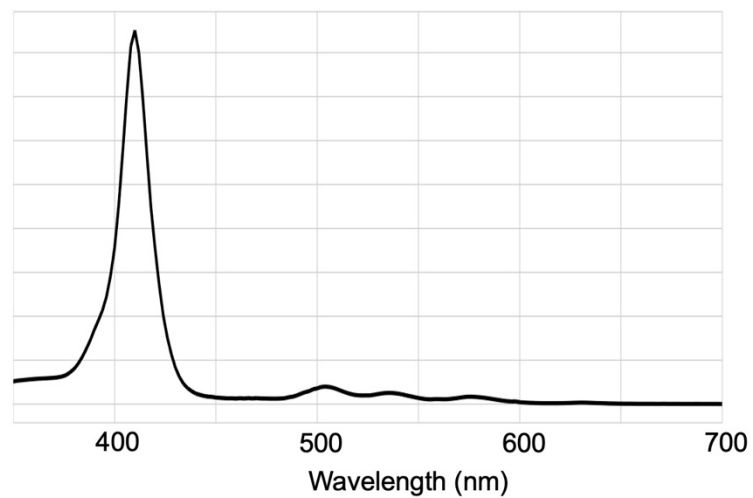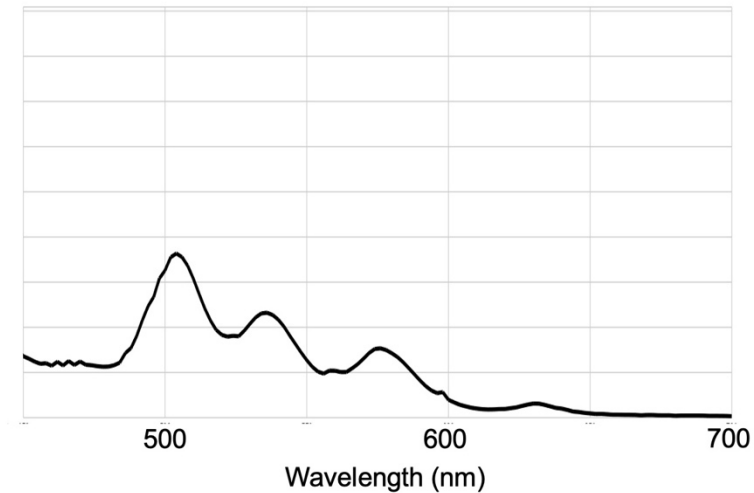

Absorption spectrum of **8** (in DMSO)



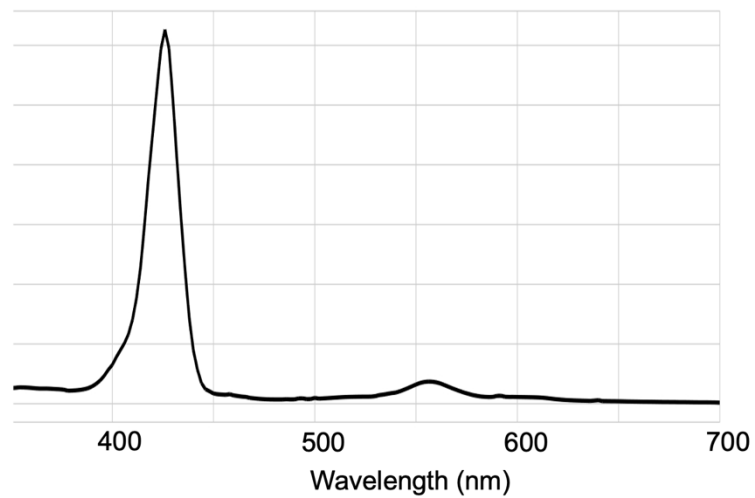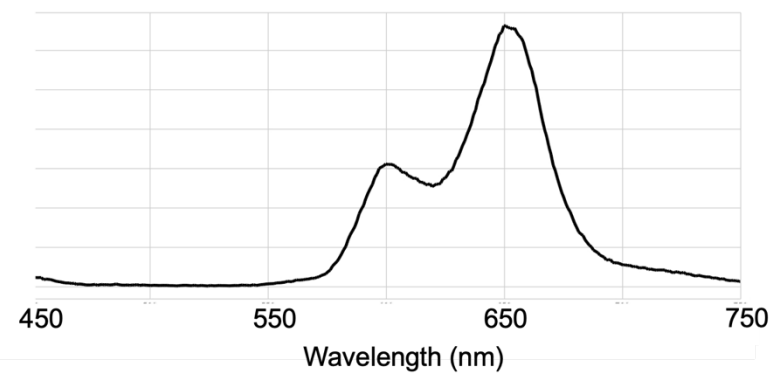

Absorption and emission spectra of **Zn8** (in DMSO)

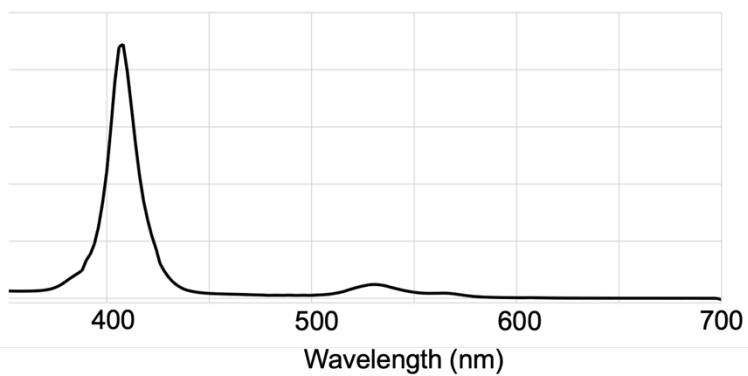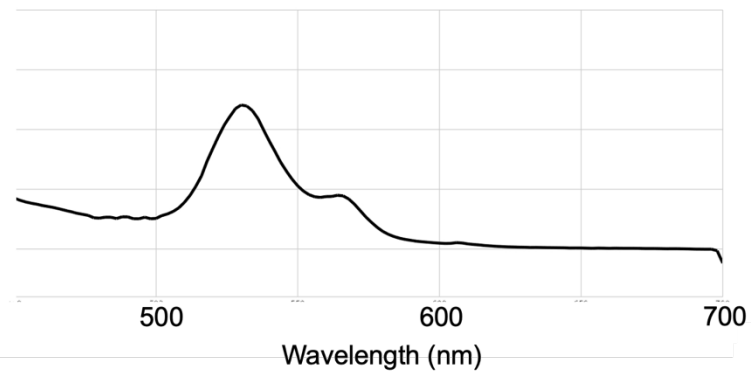

Absorption spectrum of **Cu8** (in DMSO)

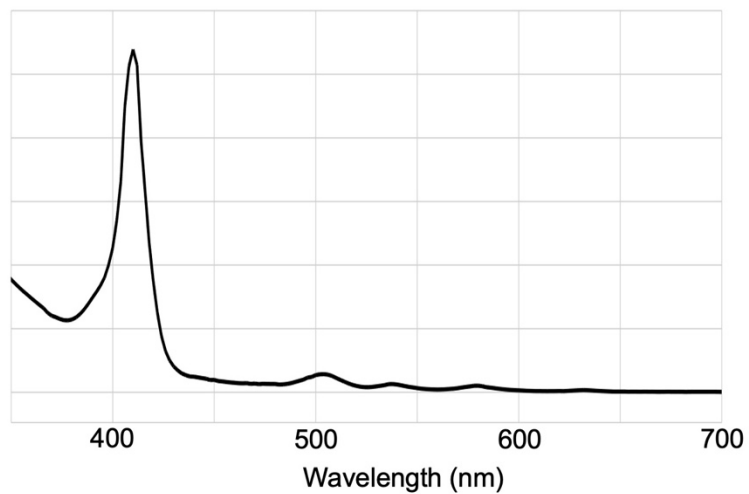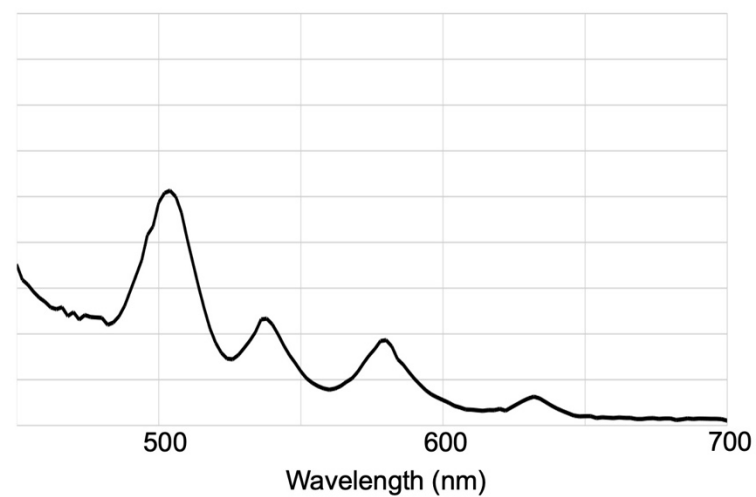

Absorption spectrum of **11** (in DMSO)

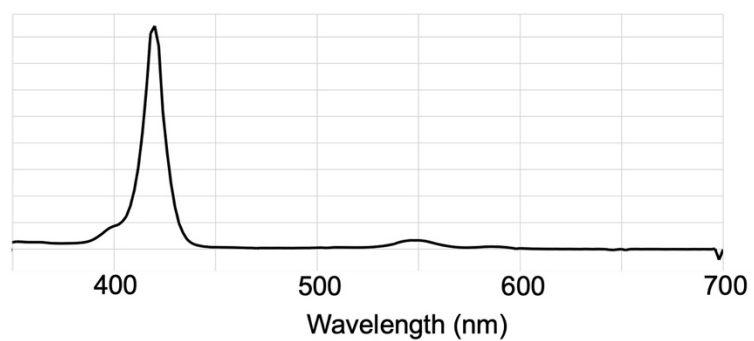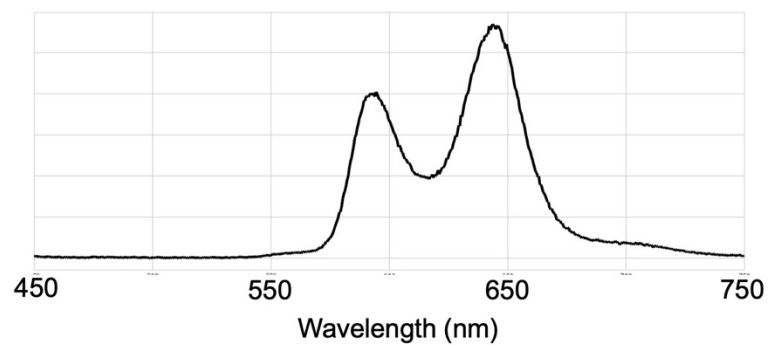

Absorption and emission spectra of **Zn11** (in DMSO)

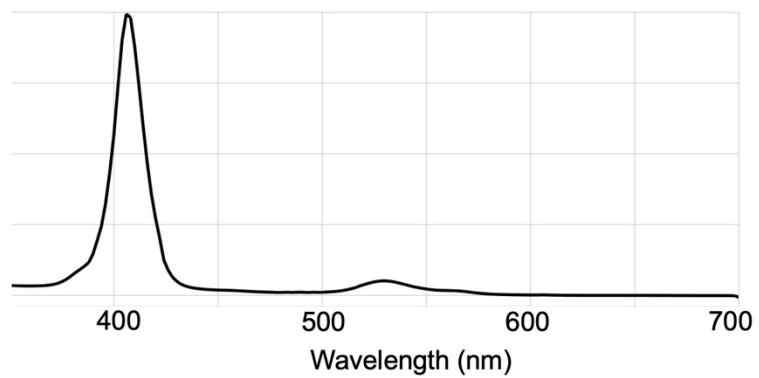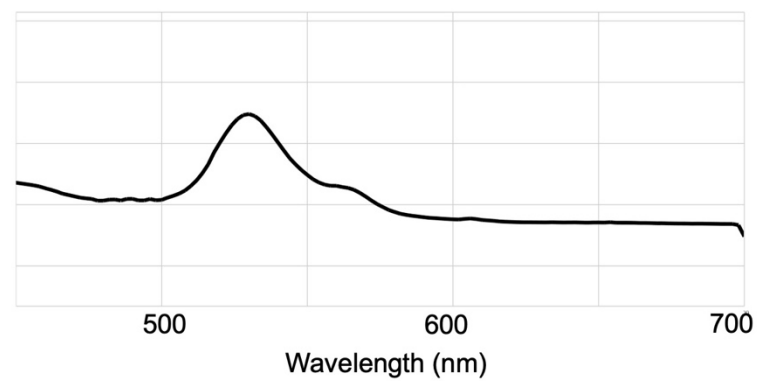

Absorption spectrum of **Cu11** (in DMSO)

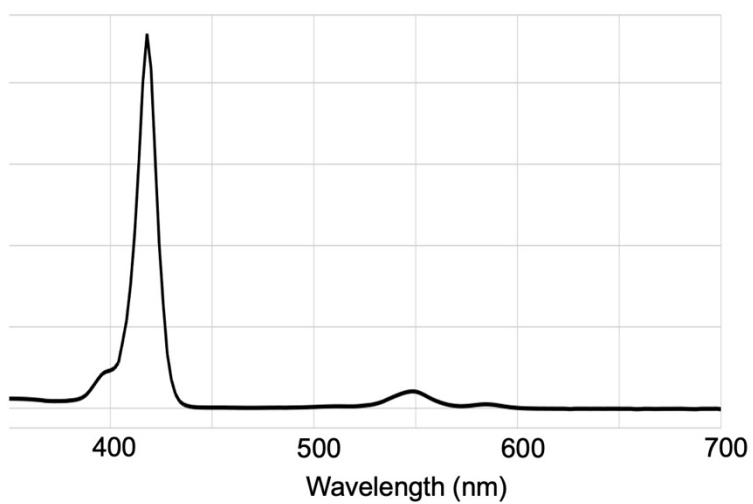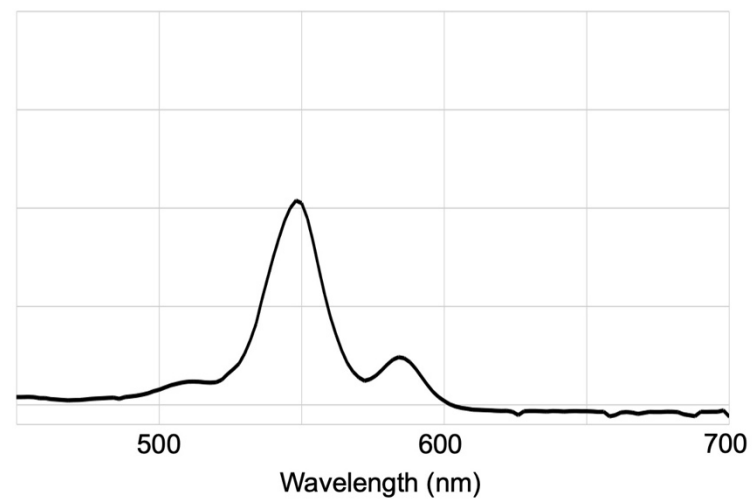

Absorption spectrum of **Zn13** (in DMSO)

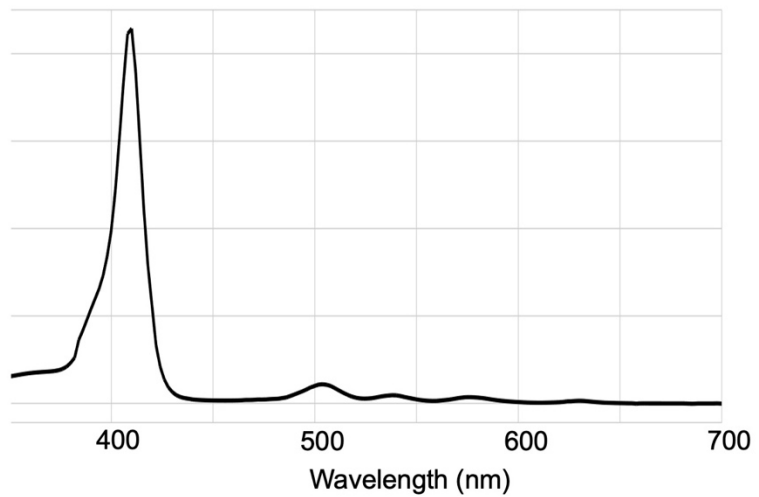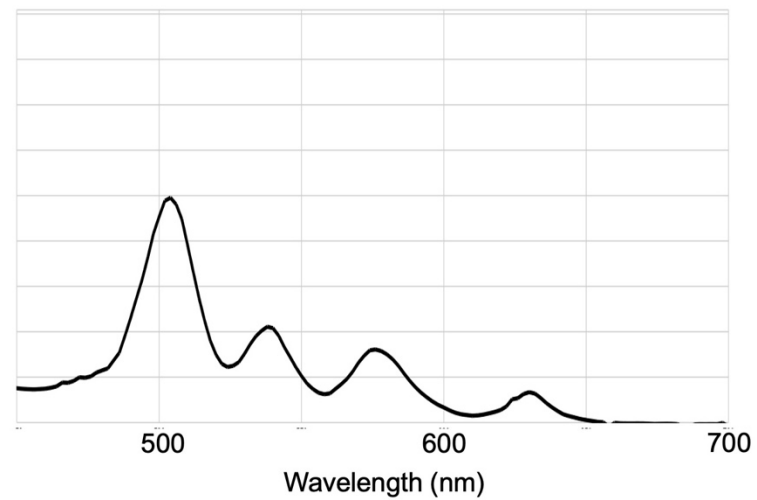

Absorption spectrum of **14** ( in DMSO)

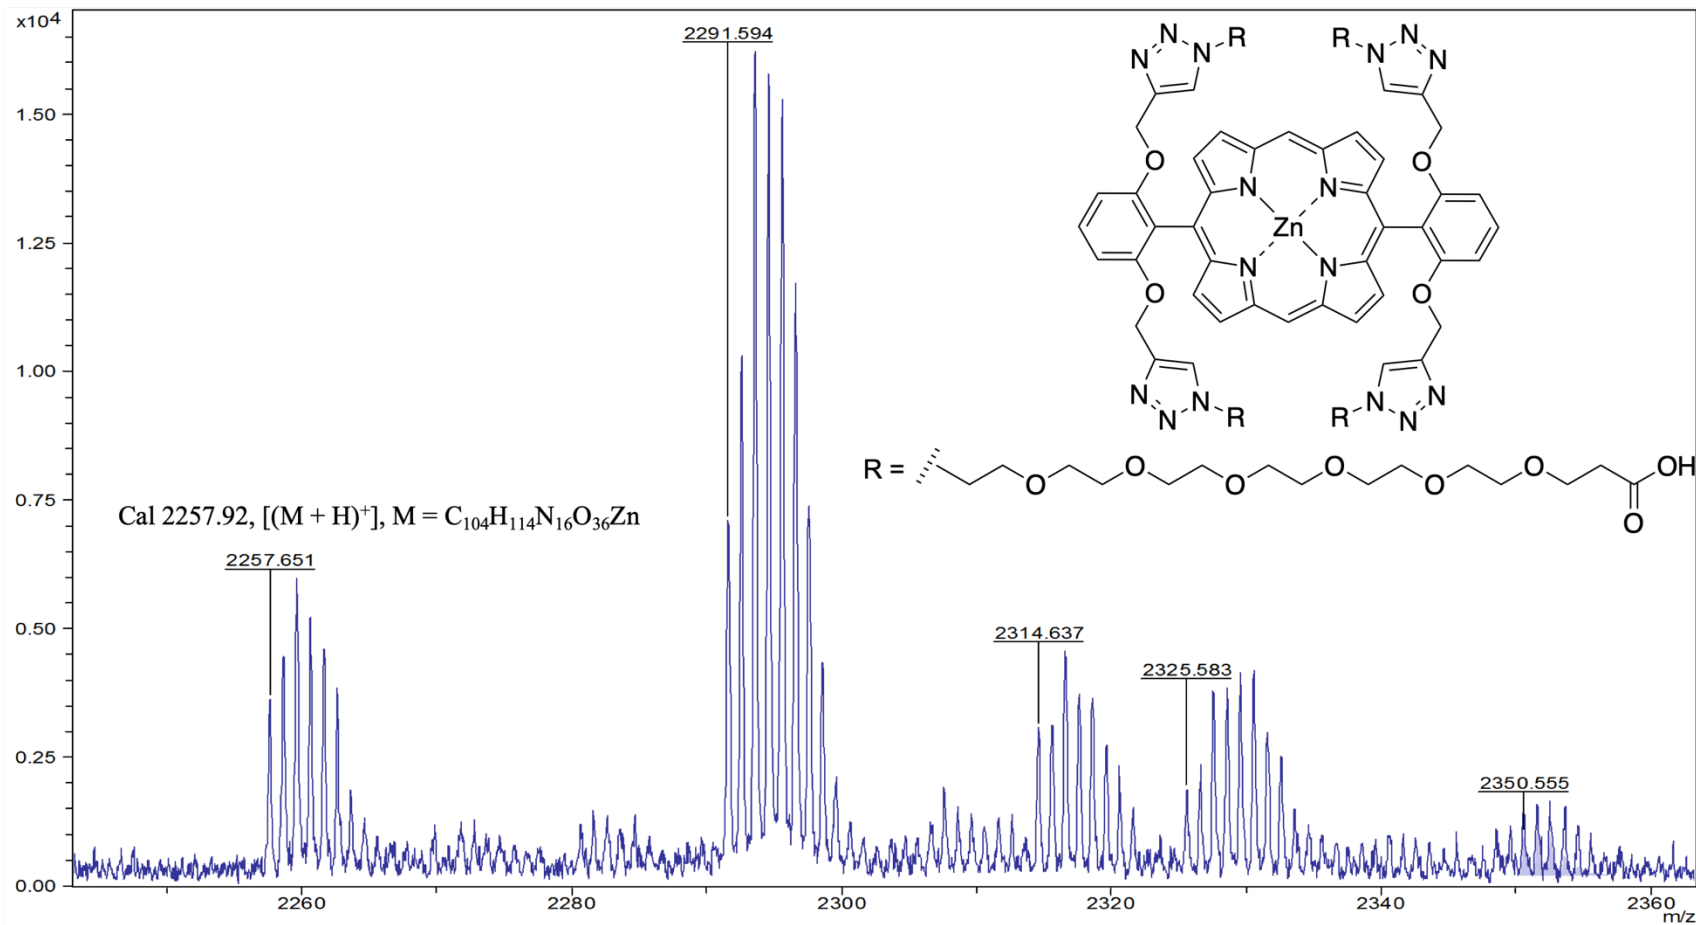

MALDI-MS of **Zn8** (using  $\alpha$ -cyano-4-hydroxycinnamic acid as the matrix)

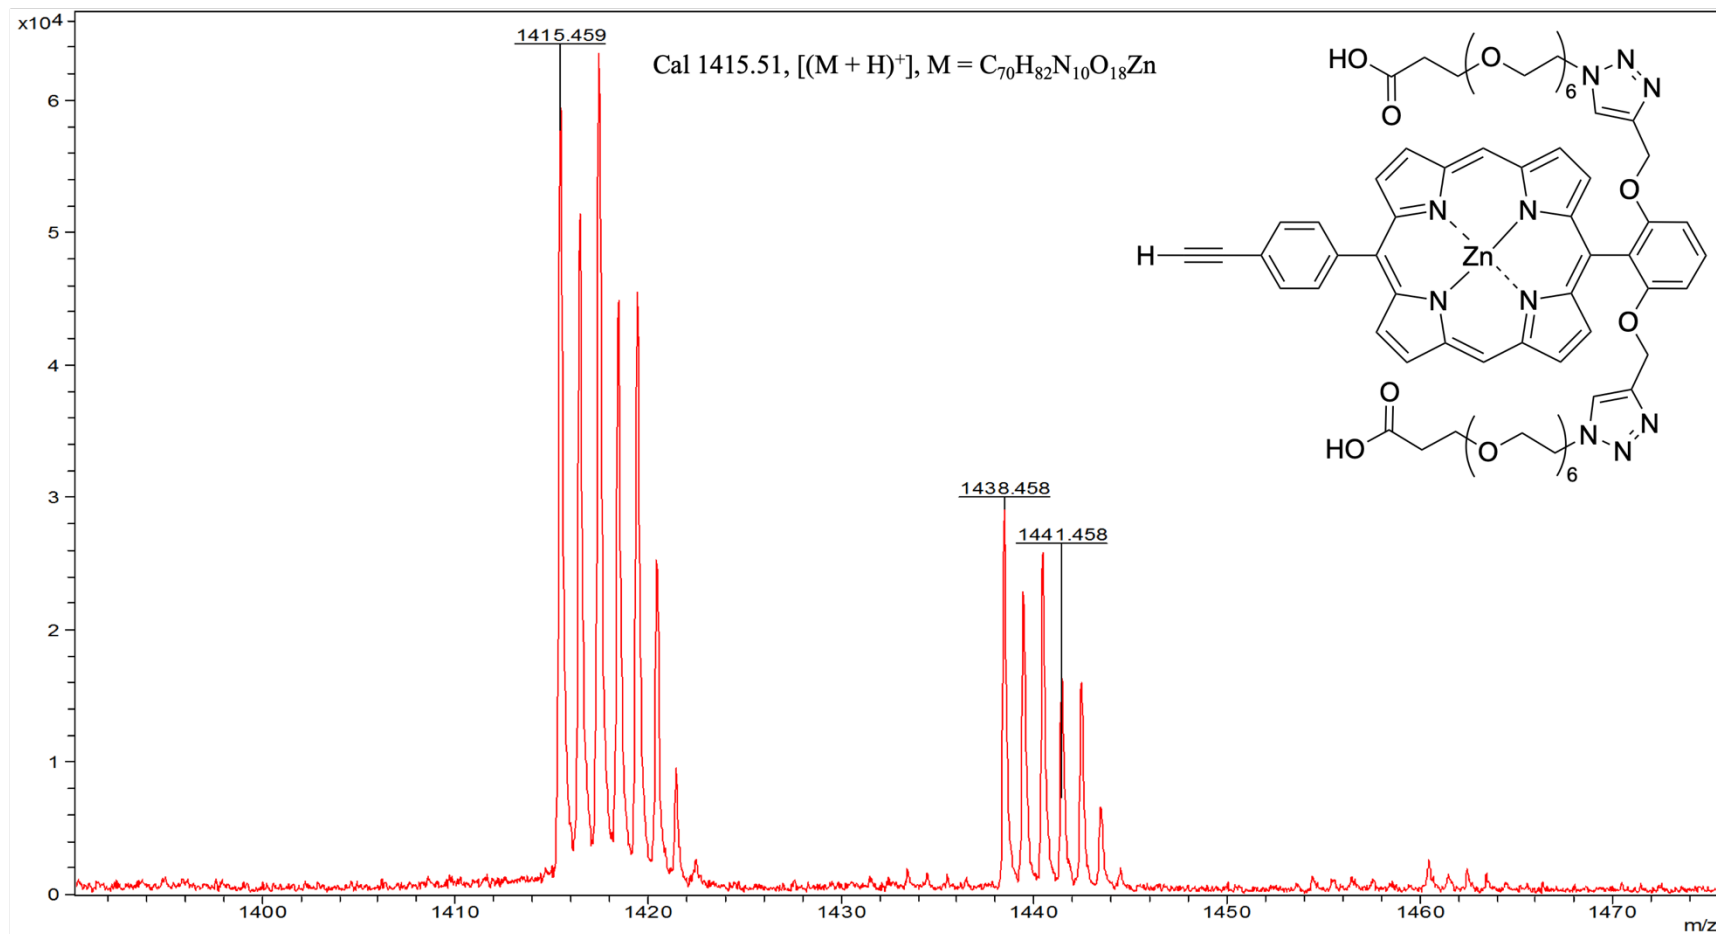

MALDI-MS of Zn11 (using  $\alpha$ -cyano-4-hydroxycinnamic acid as the matrix)

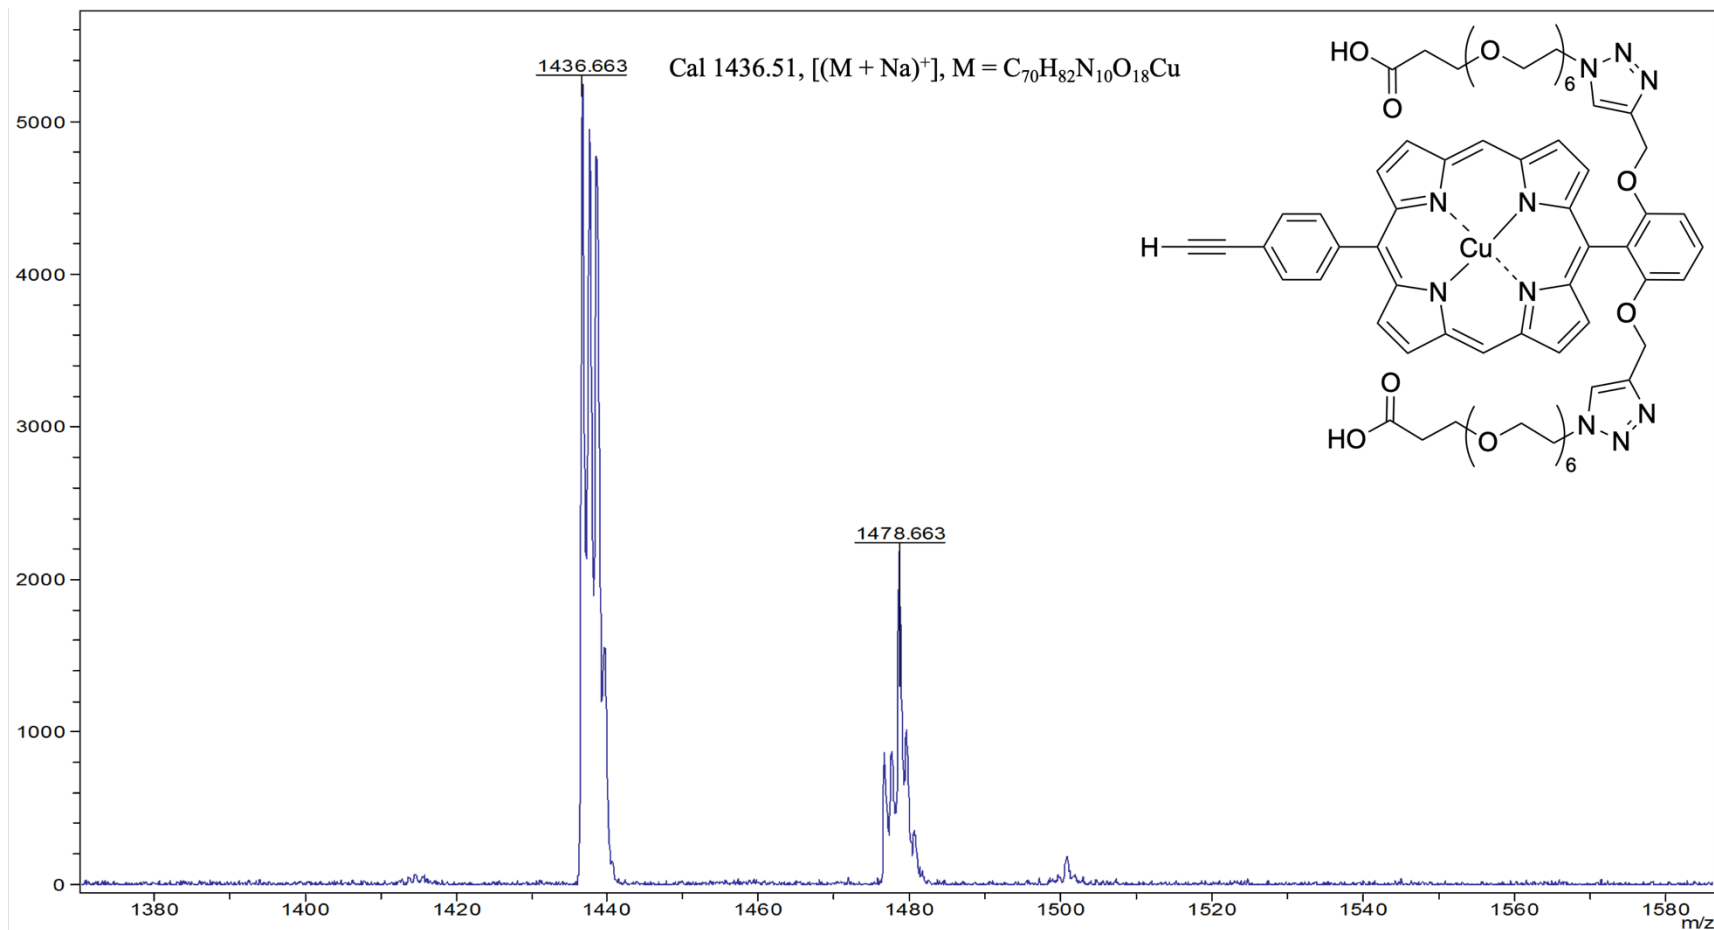

MALDI-MS of Cu11 (using  $\alpha$ -cyano-4-hydroxycinnamic acid as the matrix)
